# Supplementary material
Source: PubMed Central journal article supplement (PMC5664494)
Supplement: pnas.1704862114.sapp.pdf [file pnas.1704862114.sapp.pdf]

## **Supporting Information Appendix Sansone et al**

“Packaging and transfer of mitochondrial DNA via exosomes regulate escape from dormancy in hormonal therapy resistant breast cancer”

### **Materials and Methods**

#### **Patient Plasma Collection**

Human peripheral plasma samples (5-10ml) were obtained in EDTA tubes from 1) control healthy subjects, 2) patients with early stage breast cancer (who had their tumor surgically removed) and were cancer free, 3) de novo metastatic disease who had not started therapy and 4) in those with progression of metastatic disease on anti-estrogen therapy at Memorial Sloan Kettering Cancer Center and all pathologically confirmed. All individuals provided informed consent for blood donation on approved institutional protocols (MSKCC IRB 12-137). Once blood was drawn, plasma was isolated within 4 hours. No samples were frozen.

#### **Isolation and Nuclease treatment of EVs**

Briefly plasma and conditioned media was centrifuged at 3000g for 20 min to remove any cell contamination. To remove apoptotic bodies, mitochondrial particles and large cell debris, the supernatants were centrifuged at 12,000g for 30 min. EVs were collected by spinning at 100,000g for 70 min. EVs were resuspended in 25ml of 1X PBS and loaded on a 5 ml 30% sucrose cushion (300g/L sucrose, 24g/L Tris base, pH 7.4). Samples were centrifuged at 100,000xg for 90' at 4°C. 3.5ml of the cushion, containing EVs, was diluted with 1X PBS and centrifuged at 100,000xg for 90' at 4°C. The EV containing pellet was resuspended in 25µl of PBS. Prior EV RNA/DNA isolation, EVs were treated with 1U of Baseline-ZERO™ DNase0 (Epicentre), in order to eliminate contaminating ss- and ds-DNA, and processed with different nucleases to analyze its

chemical and physical status. Enzymes were heat inactivated with an incubation of 10 minutes at 70°C.

### **In vivo studies: EV education of hormonal therapy resistant experimental breast cancer**

All cancer cell lines were engineered to express a GFP positive luciferase expression vector for in vitro and in vivo imaging studies. Prior to in vivo inoculation, cancer cells were FACS sorted (for GFP) and injected bilaterally in the mammary fat pads of 5-7 weeks old non-obese diabetic/severe combined immunodeficiency mice (NOD/SCID, obtained from NCI Frederick, MD). Pre-clinical therapeutic trials were generated using xenografts from tumorigenic MCF7 and ZR751 clones treated with tamoxifen pellet or fulvestrant (Faslodex, HT, AstraZeneca), which was given intra-muscularly in the posterior/popliteal muscles (100mg/injection/weekly). The in vivo role of mtDNA+CAF-EVs in the promotion of HTR disease (Fig. 4D and Fig. 5G) was determined by first injecting HT-naïve cells ( $10^5$  MCF7/ZR751) into the MFPs of NOD/SCID mice followed by the injection of  $3 \times 10^9$  CAF-EVs (mtDNA<sup>hi</sup>-EV or mtDNA<sup>lo</sup>-EVs; n=5 mice/group) into the venous circulation (retro-orbital injection,  $3 \times 10^9$  particles/mouse/weekly) of mice. EV number was determined by Nanosight analysis. After 8 weeks, once tumors were established (~1cm, BLI  $2 \times 10^9$ ), HT (fulvestrant, 100mg/mouse/weekly) was administered for an additional 6 weeks. For each in vivo experiment, cancer cells were mixed with an equal volume of Matrigel<sup>TM</sup> (BD Biosciences) in a total volume of 50µl. Bioluminescence (BLI: Xenogen, Ivis System) was used to monitor both tumor growth (weekly) and metastatic burden (at necropsy). For metastatic assays, primary tumors were removed from mice bearing MCF7 xenografts and metastatic progression was followed by BLI in

the presence of tamoxifen (pellet). All the surgical procedures and animal care followed the institutional guidelines and an approved protocol from our IACUC at MSKCC.

### **Cell lines and primary cultures**

Human cancer cell lines (Hela, Caski -cervical carcinoma-), human breast cancer cell lines (MCF7, ZR751, T47D, and BT474), human bone marrow stromal cell lines (HS5, HS27a) and human normal fibroblasts (MRC5, HMF) were purchased from the American Type Culture Collection (ATCC). Murine CAFs (mCAFs) were isolated from xenografts by FACS purification (GFP negative, EpCAM negative). All cells were mycoplasma free and maintained in MEM and RPMI (ATCC and MSKCC Media Core) supplemented with 5% fetal bovine serum (Media Core), 2mM glutamine, 100units ml<sup>-1</sup> penicillin, and 0.1mg ml<sup>-1</sup> streptomycin (Media Core).

### **Analysis of Mitochondrial function**

For in vitro labeling of mitochondria, MitoTracker dye was used (Invitrogen). For mitochondrial membrane potential TMRE was used according to manufacturer's protocol (Abcam, ab113852). Analysis of mitochondria function (fluorescence) was performed at the confocal microscopy (MSKCC). To measure mitochondrial complex activity, cell pellets were resuspended in assay buffer (125mM sucrose, 0.1mM EDTA, 25mM Tris-HCl pH 7.5, 0.025% Lauryl- $\beta$ -D-maltoside), and enzymatic activities were assayed with 0.1–0.4·10<sup>6</sup> cells/ml at 25°C spectrophotometrically. NADH:HAR reductase activity of Complex I was measured as a decrease in absorption at 340 nm ( $\epsilon_{340\text{nm}} = 6.22 \text{ mM}^{-1}\text{cm}^{-1}$ ) with 200 $\mu$ M NADH, 1mM HAR and 1mM KCN. Complex IV activity was measured as cytochrome oxidation at 550nm ( $\epsilon_{550\text{nm}} = 21.5\text{mM}\cdot\text{cm}^{-1}$ ) with 50 $\mu$ M ferrocytochrome c. Activities are expressed in  $\mu\text{mol of substrate}\cdot\text{min}^{-1}\cdot\text{mg of protein}^{-1}$ . For protein measurement cells were pelleted and resuspended in 1% deoxycholate. Protein content was determined with a BCA assay.

## **Electron Microscopy (EM)**

Cells were washed with serum-free media or appropriate buffer. Both EVs and cells were fixed with a modified Karnovsky's fix of 2.5% glutaraldehyde, 4% paraformaldehyde and 0.02% picric acid in 0.1M sodium cacodylate buffer at pH 7.2. Following a secondary fixation in 1% osmium tetroxide and 1.5% potassium ferricyanide, samples were dehydrated through a graded ethanol series and embedded in an epon analog resin. Ultrathin sections were cut using a Diatome diamond knife (Diatome, USA, Hatfield, PA) on a Leica Ultracut S ultramicrotome (Leica, Vienna, Austria). Sections were collected on copper grids further contrasted with lead citrate and viewed on a JEM 1400 electron microscope (JEOL, USA, Inc., Peabody, MA) operated at 120 kV. Images were recorded with a Veleta 2K x2K digital camera (Olympus-SIS, Germany).

## **Nucleic acid extraction**

DNA extraction: cell pellets and EVs (ultracentrifugation of  $10^{12}$  cells) were resuspended in 25 $\mu$ l of 1X PBS followed by the addition of 450 $\mu$ l of DNA extraction buffer (SDS 0.5-1%, Tris-HCl 50mM pH 8.0, EDTA 0.1M) and 0,1mg/ml proteinase K 20mg/ml (ThermoFisher Scientific) and incubated O/N at 56°C. 500 $\mu$ l of phenol/chloroform (ThermoFisher Scientific) was added to each sample and centrifuged at 13,000 rpm for 5' at room temperature. The upper phase, containing the DNA, was transferred to a new tube where 500 $\mu$ l of chloroform were added. Samples were centrifuged at 13,000 rpm for 5' at room temperature; the DNA was washed a second time by repeating this step. The upper phase was transferred to a new tube with 450 $\mu$ l of isopropanol and 50 $\mu$ l of NaAc 3M. The samples were centrifuged at 13,000 rpm for 10' at 4°C. The supernatant was discarded and the pellet washed with 750 $\mu$ l 70% EtOH and centrifuged at 13,000 rpm for 5' at 4°C. The DNA pellet was air dried, resuspended in 20 $\mu$ l of DEPC H<sub>2</sub>O and incubated at 37°C for 30'. DNA concentration was measured by loading 1 $\mu$ l of DNA on a Thermo Scientific NanoDrop™ 1000 Spectrophotometer and stored at -20°C until further

analyzed. For RNA extraction we used trizol (Invitrogen). EVs were suspended in 500µl of Trizol and vigorously mixed. The samples were centrifuged at 12,000xg for 30 seconds. 200µl of chloroform were added, mixed by inversion and incubated for 2-3' at RT. After a centrifugation at 12,000xg for 15' at 4°C, the upper phase was transferred to a new tube. 400µl of isopropanol and 3µl of glycogen were added to the sample and incubated O/N at -20°C; the samples were then centrifuged at 12,000xg for 10' at 4°C. The supernatant was discarded and the pellet washed in 750µl of cold 75% EtOH. The RNA was pelleted with a centrifugation at 8,000xg for 20' at 4°C, air dried and suspended in 10µl of DEPC H<sub>2</sub>O. The RNA concentration was measured with a Thermo Scientific NanoDrop™ 1000 Spectrophotometer and treated for 1 hour at 37°C with 1U (for EVs) or 2U (for cells) of Baseline-ZERO™ DNase (Epicentre®). RNA was stored at -80°C.

#### **Reverse Transcription PCR (RT-PCR) and microarray analyses**

cDNA was obtained by retro transcribing 1µg of RNA -previously treated with 1U (EVs) or 2U (cells) of Baseline-ZERO™ DNase0 (Epicentre®)- and using iScript™ Select cDNA synthesis Kit (Bio-Rad). The cDNA was kept at -80°C for further analysis. For microarray analysis 250ng of RNA was processed, assayed and run on Illumina GX Human HT12 platform prepared according to the manufacture's' protocol at the Genomic Molecular Core Facility (MSKCC). Data were analyzed, submitted at GEO (GSE84104).

#### **Rolling Circle PCR and canonical PCR**

DNA was isolated using phenol/chloroform (ThermoFisher Scientific). Each amplification reaction was performed on a total of 20ng of DNA using the GeneAmp® PCR System 9700, version 2.5. The amplification program was the following: (i) Polymerase activation (2 min at 95°C), (ii) amplification stage (35 cycles, with each cycle consisting of 30 seconds at 95°C, 30 seconds at 60°C, and 60 seconds at 72°C), and (iii) extension stage (5 min at 72°C). All amplification reactions were performed using the GoTaq® Flexi

DNA Polymerase kit (Promega). PCR products were resolved on a 2% agarose gel. All primers used for this assay are listed at the end of the methods section. Rolling Circle amplification (RCA) was performed in EV-DNA according to the manufacturer's protocol (GE Healthcare Life Sciences): 1) EV-DNA was first digested with Plasmid Safe ATP-DNAse (Epicentre<sup>®</sup>, 1U for 1 hour at 37°C) in order to degrade all non circular DNA 2) 10ng of previously digested EV-DNA was amplified using RCA methodology 3) 2ng of post-RCA amplicons were then amplified using qPCR with specific mtDNA and housekeeping DNA primers (Fig. S3D and Table S4).

### **Real time PCR**

DNA and cDNAs were amplified by quantitative PCR (qPCR) using the Applied Biosystem Viia<sup>™</sup> 7 Real-Time PCR System in the Power SYBR<sup>®</sup> Green PCR Master Mix Buffer. Each sample was run in triplicate. DNA amplification was performed on 2ng DNA/reaction; cDNA amplification was performed on 1 $\mu$ l of the cDNA/triplicate. All primers used in the Real Time assay are listed at the end of the section. For analysis,  $\Delta\Delta_{ct}$  method was applied and fold change was calculated ( $2^{-\Delta\Delta_{ct}}$ ). In order to verify the specificity of the amplicons, other than the analysis of the Melting Temperature, amplicons were visualized on a 2% agarose gel using the ChemiDoc<sup>™</sup> XRS+ System (Bio-Rad).

### **EV labeling and transfer to recipient cells**

EVs from CAFs, were labeled using the PKH67 Green Fluorescent Cell Linker Kit for General Cell Membrane Labeling (Sigma-Aldrich) and Ethidium bromide (EtBr, 1.5ng/sample) for DNA staining.  $10^5$  HTD cells (MCF7 cells treated with HT-see description of cell lines) were grown in Nunc<sup>®</sup>Lab-Tek<sup>®</sup>Chamber Slide (Sigma-Aldrich), had been previously coated with fibronectin to allow for cell adhesion. Cells were then treated with  $3 \times 10^7$  labeled EVs and their localization determined 48 hours later.

Mitochondria were labeled using Red-MitoTracker® (25nM for 30 minutes at 37°C). Cells were washed and fixed (4% paraformaldehyde) and nuclei were stained with DAPI. Fluorescent confocal microscopy (Nikon Eclipse TE2000U) was used to localize EVs (green channel-PKH67), mitochondria (red channel) and nuclei acid (far red for EtBr) and analyzed using Nikon software (EZ-C1 3.6).

### **Protein, Immunohistochemistry and in vitro studies**

For immunoblotting assays, cells were lysed in buffer (50mmol/L Tris at pH 7.5, 150mmol/L NaCl, 5µg/mL aprotinin, pepstatin, 1% NP-40, 1mmol/L EDTA, 0.25% deoxycholate, and protease inhibitor cocktail tablet, Sigma). Proteins were separated by SDS-PAGE, transferred to PVDF membranes, and blotted with specific antibodies: OXPHOS complex Antibody (Invitrogen, 45-7999, this antibody recognizes the mitochondrial subunit ATP5A1); tubulin (Santa Cruz Biotech. Inc: 10D8); Cd63 (EXOAB-CD63A-1, System Bioscience) and Actin (Santa Cruz Biotech. Inc). For immunostaining assays: organs were collected and fixed overnight in 4% paraformaldehyde, washed, embedded in paraffin and sectioned (Histo-Serve). H&E staining was performed by standard methods. The enrichment of CAFs in xenografts was determined by desmin immunohistochemistry (IHC) in tumour-derived sections. IHC was performed on Leica Bond RX (Leica Biosystems) with 1µg/ml Desmin Rabbit polyclonal antibody (Abcam cat#ab8592). For determination of cell viability, we seeded 2,500 cells per well in 96-well plates and treated them with fulvestrant (10µM). Viable cells were determined 7-14 days after treatment using trypan blue and cell counting using bright field microscopy or DAPI exclusion staining by flow cytometry (Dako Cytomation). Proliferation assays were carried out using CalceinAM technology (Invitrogen) or bioluminescence: cells were seeded in 96 wells plates treated with the pre-fluorescent/luciferin compound for 20min

and fluorescence/bioluminescence was read using a plate reader (SpectraMax plate platform/IVIS BLI xenogen).

### **Semi-Quantitative Mass Spectrometry analysis of CAF EV**

Mass spectrometry analyses of EV were performed at the Rockefeller University Proteomics Resource Center (New York, NY, USA) using 10 $\mu$ g of CAF-EV protein. Samples were denatured using 8M urea, reduced using 10mM dithiothreitol, and alkylated using 100mM iodoacetamide, followed by proteolytic digestion with endoproteinase LysC (Wako Chemicals), and subsequent digestion with trypsin (Promega) for 5 hours at 37 °C and quenched with formic acid and the resulting peptide mixtures were desalted. Samples were dried and solubilized in buffer containing 2% acetonitrile and 2% formic acid. Approximately 3–5  $\mu$ g of each sample was analysed by reverse-phase nano-LC-MS/MS (Ultimate 3000 coupled to QExactive, Thermo Scientific). Following loading on the C18 trap column (5  $\mu$ m beads, Thermo Scientific) at a flow rate of 3 $\mu$ l min<sup>-1</sup>, peptides were separated using a 75- $\mu$ m-inner-diameter C18 column (3  $\mu$ m beads Nikkyo Technos) at a flow rate of 200nl min<sup>-1</sup>, with a gradient increasing from 5% Buffer B (0.1% formic acid in acetonitrile)/95% Buffer A (0.1% formic acid) to 40% Buffer B/60% Buffer A, over 140 minutes. All LC-MS/MS experiments were performed in data-dependent mode. Precursor mass spectra were recorded in a 300–1,400 *m/z* mass range at 70,000 resolution, and 17,500 resolution for fragment ions (lowest mass: *m/z* 100). Data were recorded in profile mode. Up to 20 precursors per cycle were selected for fragmentation and dynamic exclusion was set to 45 seconds. Normalized collision energy was set to 27. Data were extracted and searched against Uniprot complete Mouse proteome databases (January 2013) concatenated with common contaminants using Proteome Discoverer 1.4 (Thermo Scientific) and Mascot 2.4 (Matrix Science). All cysteine residues were considered alkylated with acetamide. Amino-terminal glutamate to pyroglutamate conversion, oxidation of methionine, and



protein N-terminal acetylation were allowed as variable modifications. Data were first searched using fully tryptic constraints. Matched peptides were filtered using a Percolator-based 1% false discovery rate. Spectra not being matched at a false discovery rate of 1% or better were re-searched allowing for semi-tryptic peptides. The average area of the three most abundant peptides for a matched protein was used to gauge protein amounts within and in between samples.

### **FACS Analysis**

Human cancer cell lines (MCF7, ZR751, T47D, and BT474), were engineered to express a GFP/Luciferase vector. Cancer cells from xenografts were isolated from primary and metastatic tissues by enzymatic digestion (Collagenase/Hyaluronidase, Sigma-Aldrich), sorted (GFP<sup>+</sup>/DAPI<sup>-</sup>) and cultured in vitro. For FACS/Flow analyses xenograft derived tumors and metastases were digested in sterile Epicult media (Stem Cell Technology), minced with sterile razor blades and incubated for 3 hours in the presence of Collagenase/Hyaluronidase (1,000Units/sample, Voden Medical). Cells were washed with PBS supplemented with 1% bovine serum albumin (PBS-BSA 1%) and filtered through a 40µM nylon mesh (BD Biosciences). For the detection of CD44 and CD133, EpCAM antigens, cells were stained in a volume of 100µl (PBS-BSA 1%) with each antibody CD44-APC (100ng/10<sup>6</sup> -10<sup>8</sup> cells Clone IM7, eBiosciences), CD133/1-PE (100ng/10<sup>6</sup> to-10<sup>8</sup> cells, clone AC133, Miltenyl Biotech) and EpCAM-FITC (250ng/10<sup>6</sup> to-10<sup>8</sup> cells, Clone VU-1D9, Stem Cell Technologies). Cells were labeled on ice for 30 min and analyzed (BD FACS Aria III, Flow Core). Samples were analyzed for cell population distribution and sorted for GFP/viability (GFP<sup>+</sup>/DAPI<sup>-</sup>) and CD133/CD44 expression. For flow plot analyses, samples were run using FlowJo 7.5 software (Tree Star).

## **Primers**

The reference sequences used for primers design are NC\_010339 for the murine mitochondrial DNA/RNA, NC\_012920 for the Human mitochondrial DNA/RNA (*SI Appendix*, Table S4).

## **Exit from dormancy via CAF-EVs**

Generation of HTD cells was performed by treating ER+ (GFP+) breast cancer cell lines (MCF7, ZR751, BT474) with HT (fulvestrant, 10 $\mu$ M) for 2 months. Single, non-proliferating cancer cells were FACS purified by gating on GFP+ cells and by DAPI exclusion staining by flow cytometry (Dako Cytomation). Viable cell number was subsequently determined using trypan blue exclusion and cell counting using bright field microscopy HTD cells were then cultured in vitro or injected in vivo for further studies. In vitro assays: HTD cell were cultured in 96-well dishes (1000 cells/well) and treated with 10<sup>7</sup> EVs (mtDNA<sup>hi</sup>-EV or mtDNA<sup>lo</sup>-EVs) weekly (4x). Half of the cultures were also treated with HT (fulvestrant, 10 $\mu$ M, Sigma-Aldrich). Proliferation was determined by Calcein AM assay (Invitrogen). HTD were cultured in low attachment (Corning) 24-well plates. These were treated with 3x10<sup>9</sup> mCAF-derived EVs (wt-mtDNA<sup>hi</sup> or  $\rho$ 0-mtDNA<sup>lo</sup>) weekly x4 in the presence with HT (fulvestrant, 10 $\mu$ M/weekly). After 40 days, mammosphere number (bright field microscopy) was determined after 40 days. In vivo assays: Dormant ZR751 cells (HTD) were isolated and 10<sup>5</sup> cells were injected in the IV inguinal MFP of NOD/SCID mice. All mice were subsequently injected with 3x10<sup>9</sup> mCAF-derived EVs (wt-mtDNA<sup>hi</sup> or  $\rho$ 0-mtDNA<sup>lo</sup>) weekly x8 (n=5 mice/group). Tumor growth was determined by BLI and after necropsy.

## **Immunogold Electron microscopy: exogenous EVs fusing with mitochondria**

Breast cancer cells (MDA-MB 231) were educated with B16F10 (murine melanoma cell line) EVs for 48 hours; cells were fixed with 2%PFA in 0.1M sodium cacodylate, pH 7.4

for 24 hours at 4 C. Cells were blocked using 3%BSA, 0.1% saponin in 0.1M sodium cacodylate and incubated overnight with a murine TSG101antibody (Novus NBP1-80244) diluted to 1:300 in blocking solution. After washing in 0.1% saponin and 0.1M sodium cacodylate, cells were incubated with secondary antibody (Biotin anti-Rabbit, Vector Labs Cat#BA-2000) diluted to 1:1000 in blocking solution for 2 hours and washed again. Finally, cells were incubated with Alexa Fluor488 streptavidin FluoroNanogold (Nanoprobes, Cat#7216) diluted to 1:50 in blocking solution for 2 hours, washed and fixed in 2.5% glutaraldehyde overnight at 4°C. HQ Silver enhancement (Nanoprobes, Cat#2012) was performed for three minutes. TSG101 localization was confirmed using immunofluorescence before electron microscopy processing.

### **Electron Microscopy Processing**

Sections were post-fixed in 1% Osmium tetroxide in 0.1M sodium cacodylate for 60 minutes on ice. After washing with water, cells were placed in 1% aqueous uranyl acetate for 30 minutes, dehydrated in a graded series of ethanol and embedded in Eponate. Sections were cut at 70nm, transferred to formvar coated slot grids and imaged on a JEOL 100CX at 80kVwith an AMT XR41 digital imaging system (Rockefeller University Electron Microscopy Core Center).

**A**

EV-nuclear DNA from patients with ER+ BCa

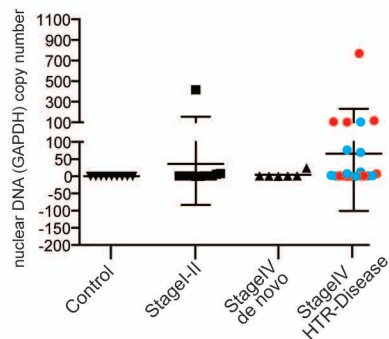**B**

EV-mtDNA from patients with ER+ BCa

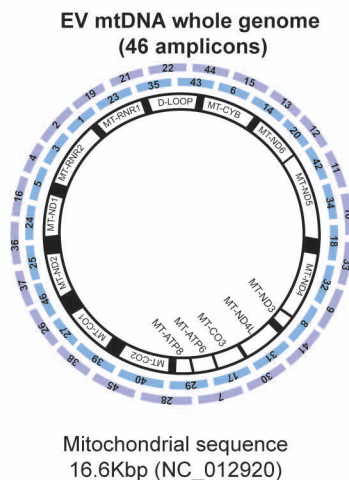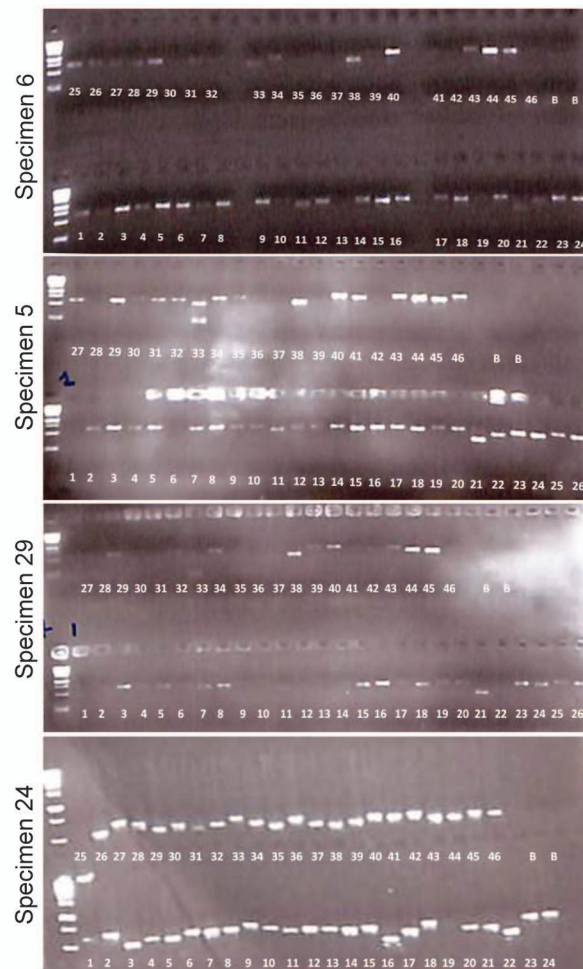

**Fig. S1.** Circulating EV DNA is enriched for whole mtDNA genome. (A) Dot plot of nuclear DNA copy number quantification as determined by qPCR for *GAPDH* gene in circulating EVs isolated from fresh collected plasma (5-8ml) of 8 healthy controls and 20 luminal breast cancer patients at different stage of their disease (*SI Appendix*, Table S1). Each point corresponds to a patient sample. (B) Schematic and gel electrophoresis of whole mtDNA genome amplified in several patient derived circulating EV-DNA resulting from 46 overlapping PCR amplicons to cover all the mtDNA genome.

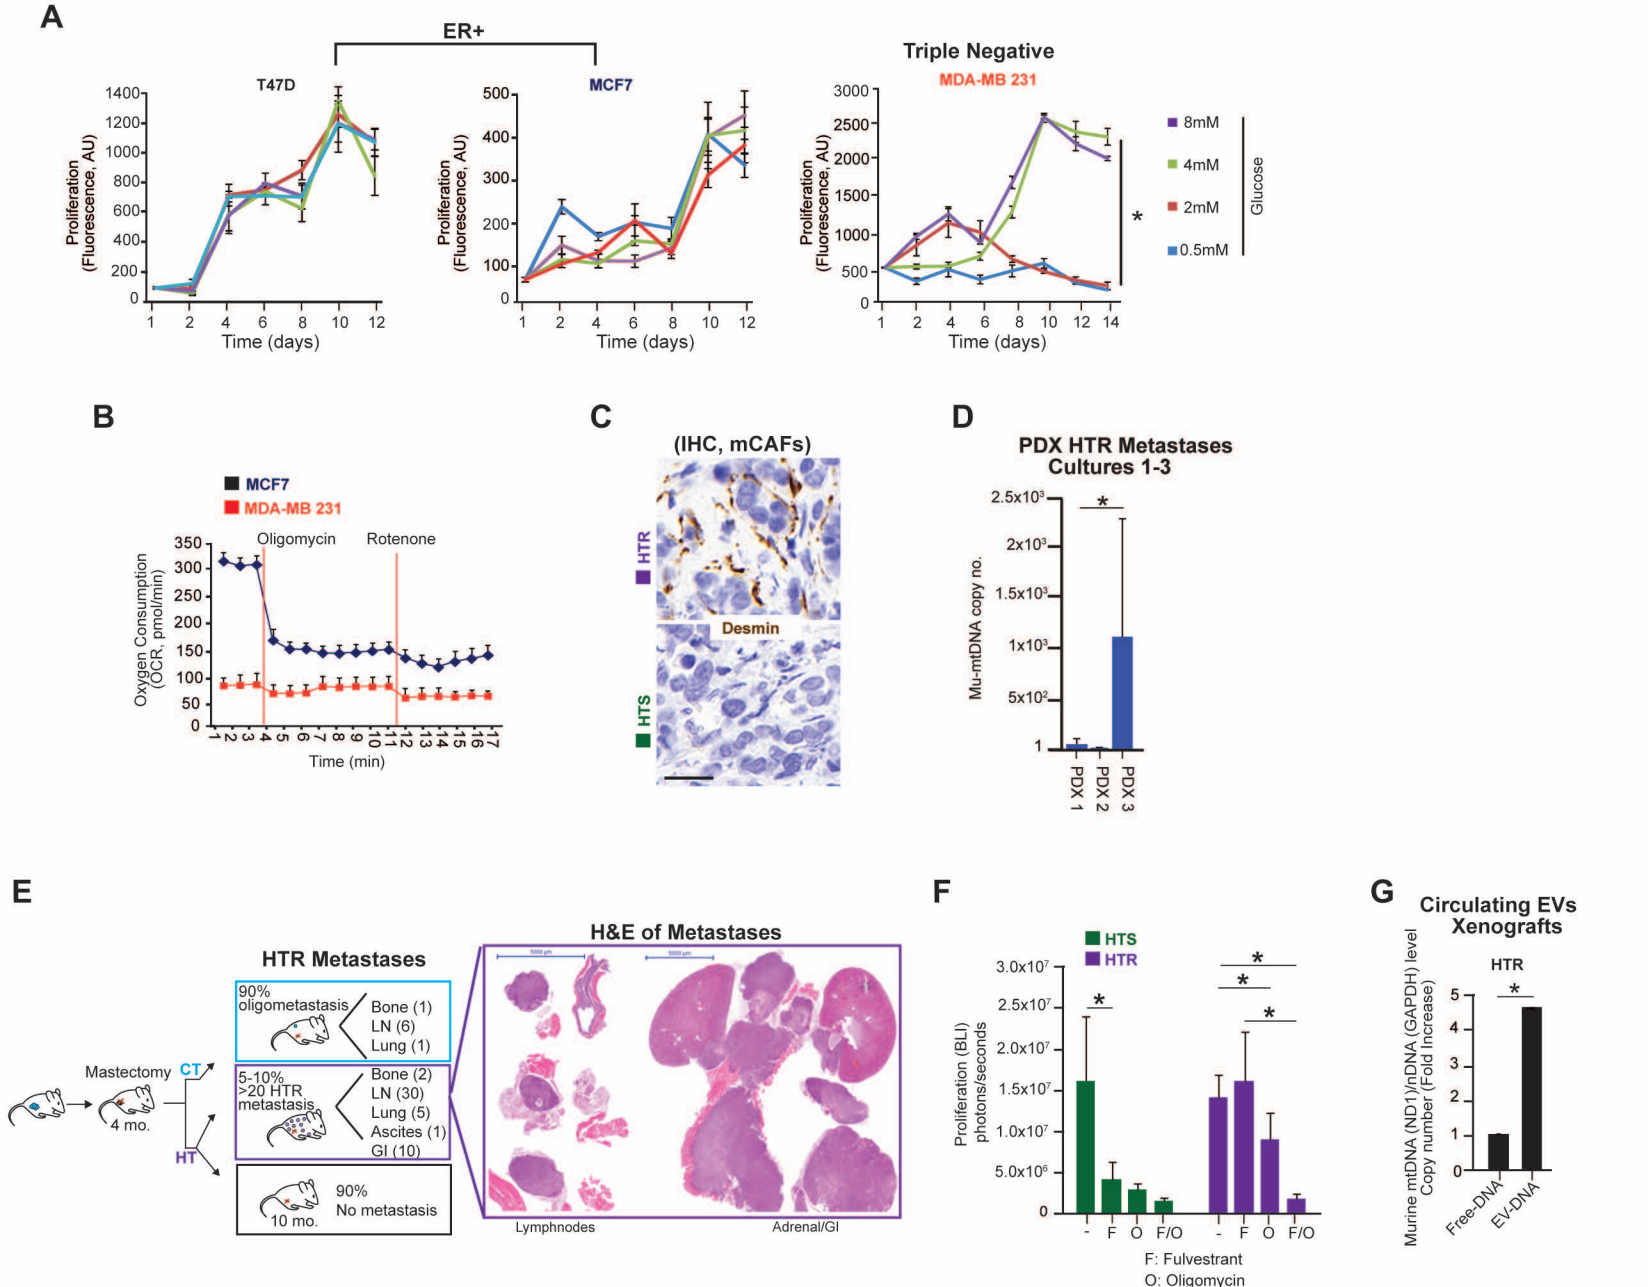

**Fig. S2.** OXPHOS inhibition abrogates HTR disease. (A) Proliferation potential as determined by in vitro cell growth (CalceinAM, fluorescence) in luminal (ER+) and triple negative cancer cell lines cultured in media with increasing concentration of glucose. (B) Oxygen consumption rates (OCR)  $\pm$  oligomycin (200nM)/rotenone (100nM) in MCF7 and MDA-MB-231 cells as determined by seahorse technology. (C) Desmin immunohistochemical images of mCAFs in HTS/HTR-derived tissues (scale bar 25 $\mu$ m). (D) Murine (Mu)-mtDNA level as copy number (qPCR, *ND1*) in FACS (Epcam+/Dapi-) purified cancer cells from 3 different PDX cultures (PDX 1-3) generated from patient bone breast cancer metastases injected in the mammary fat pad of nude mice (see *SI Appendix, Materials and Methods*). (E) Schematic analysis of the generation of metastatic HTR disease in mice. Following 4 months from primary tumor xenografts (MCF7), tumor tissues were removed and mice were randomized to receive HT (fulvestrant, 100 $\mu$ g/injection/weekly). Metastatic burden was analyzed by BLI and at necropsy by histological examination (H&E). (F) Proliferation potential in presence of oligomycin (100nM) and  $\pm$ HT as determined by in vitro BLI in metastatic cells from HTS and HTR cells FACS purified from xenografts (Fig.2A). Error bars, mean  $\pm$  s.d. of BLI from n=3 samples. (G) mtDNA/nDNA level in circulating EVs from HTR xenografts as determined by copy number (*GAPDH*, *ND1*: qPCR Fold change). Data are reported as error bars, mean  $\pm$  s.d. of n=3 independent experiments (A, D-G). \* $P$ <0.05 (Student's t-test) and GLM anova after multiple comparisons (A).



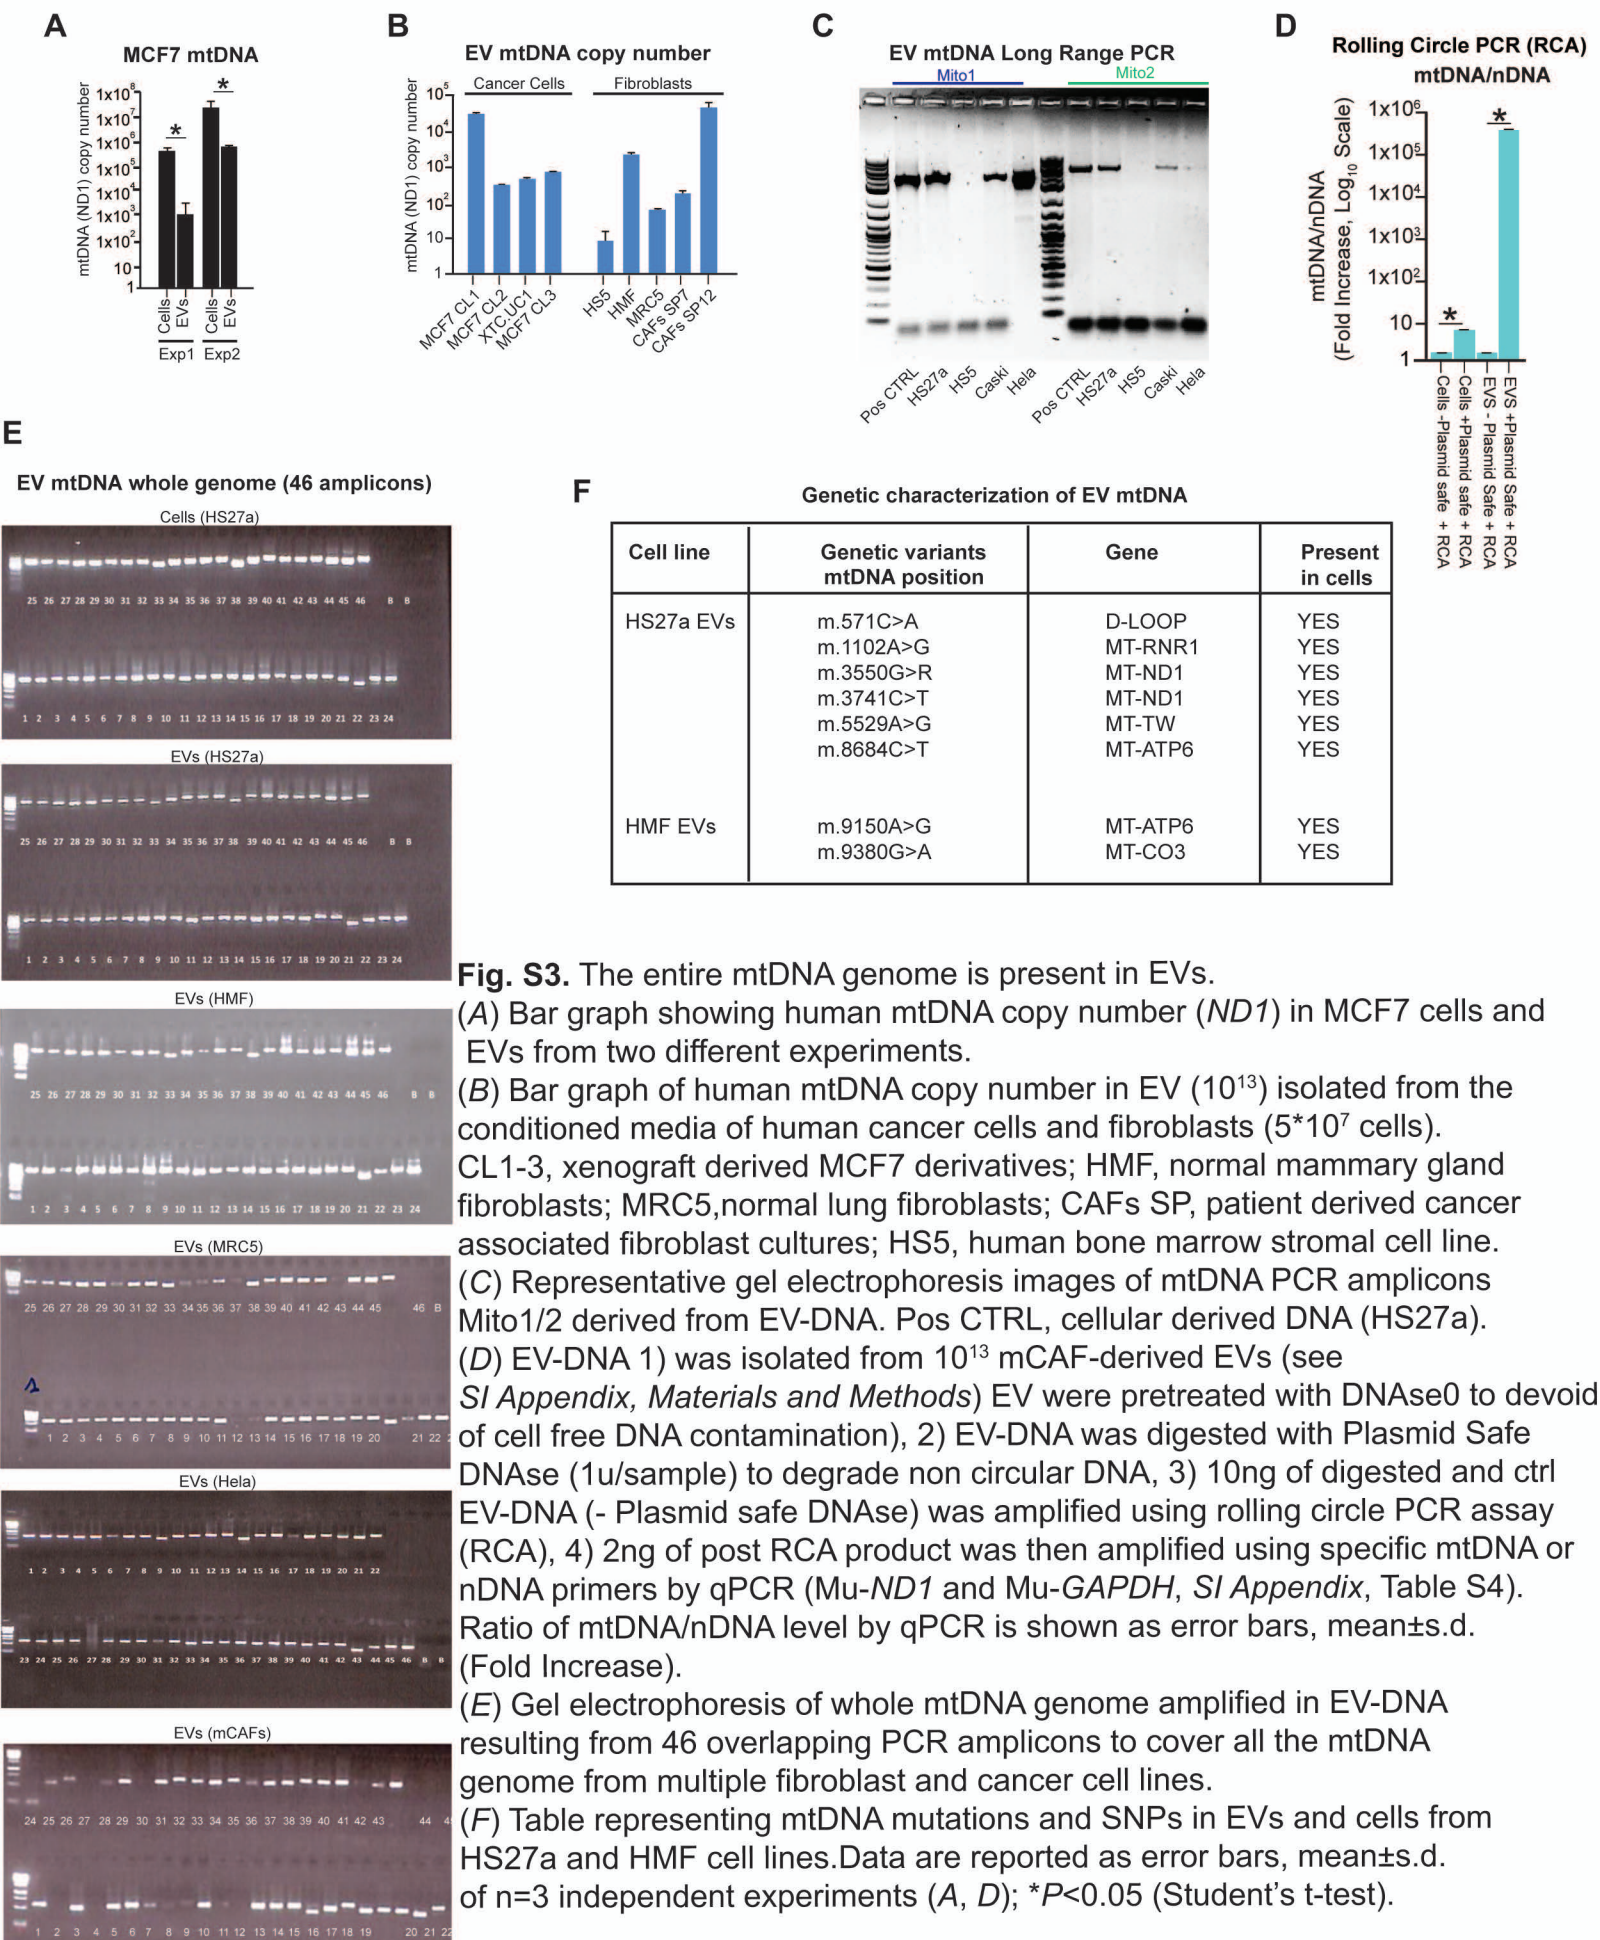

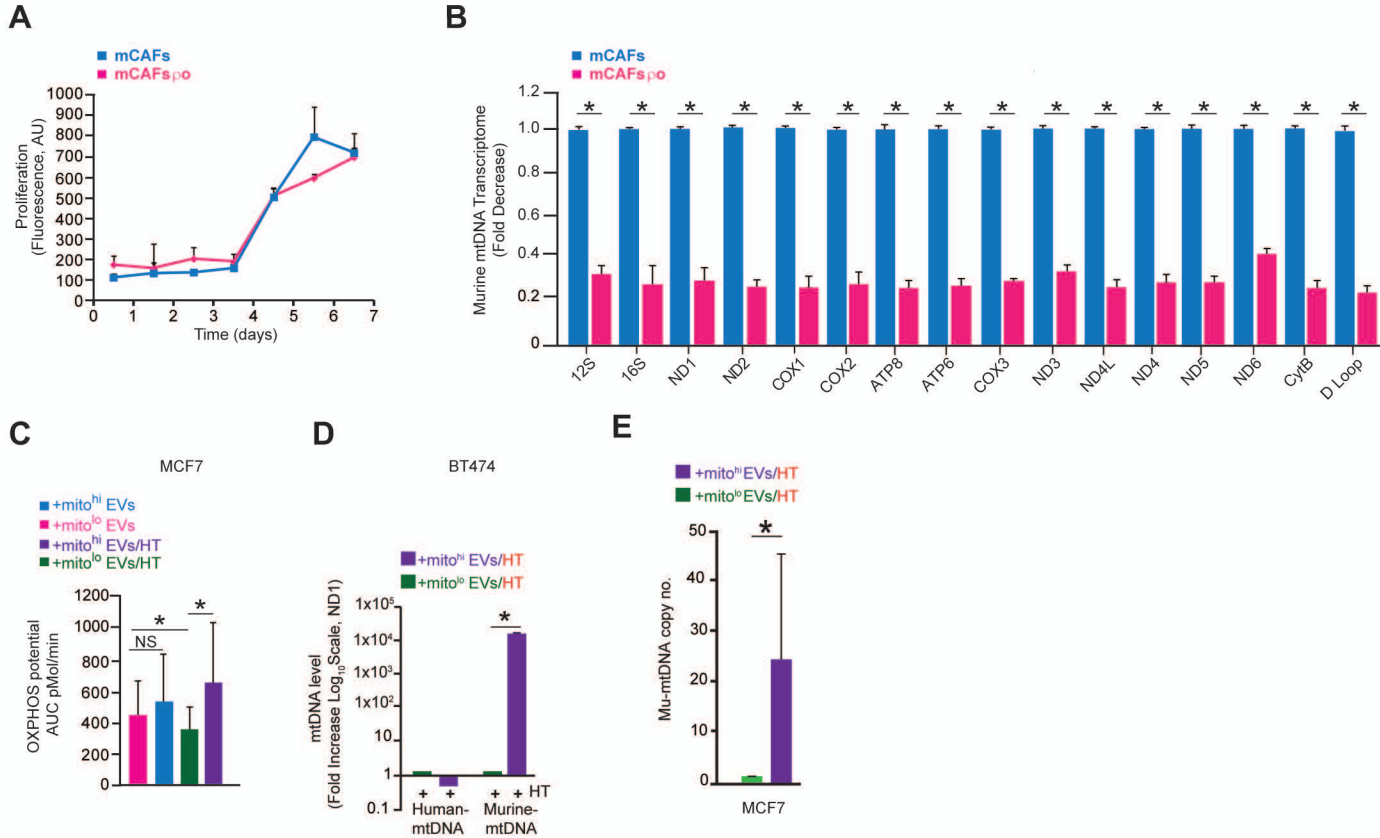

**Fig. S4.** Depletion of mitochondria DNA in CAFs hampered the EV-dependent up-regulation of OXPPOS potential in HT cells.

(A) Proliferation potential as determined by in vitro cell growth (CalceinAM) in mCAFs (wild type or  $\rho 0$ ). (B) Mitochondrial transcriptome as determined by qPCR in mCAFs cells (wild type or  $\rho 0$ ). Error bars, mean  $\pm$  s.d of fold change (reference wild type). \* $P < 0.05$  (Student's t-test). (C) OXPPOS potential in cancer cells  $\pm$ HT (fulvestrant, 10  $\mu$ M) administered for 48 hours with mito<sup>lo</sup>-EVs and mito<sup>hi</sup> EVs ( $10^{13}$ EVs for  $10^6$  cells). Error bars, mean  $\pm$  s.d of respiration rate under mitochondrial stressors (FCCP, oligomycin, rotenone). \* $P < 0.05$  (Student's t-test). (D) mtDNA level (qPCR, ND1) in HTS and HTR cells  $\pm$ HT from Fig.4C (fulvestrant, 10  $\mu$ M). Error bars, mean  $\pm$  s.d. of fold change (reference HTS). (E) Murine (Mu)-mtDNA level as copy number (qPCR, ND1) in FACS (GFP+/Dapi-) purified cancer cells from xenografts (Fig.4D). \* $P < 0.05$  (Student's t-test).



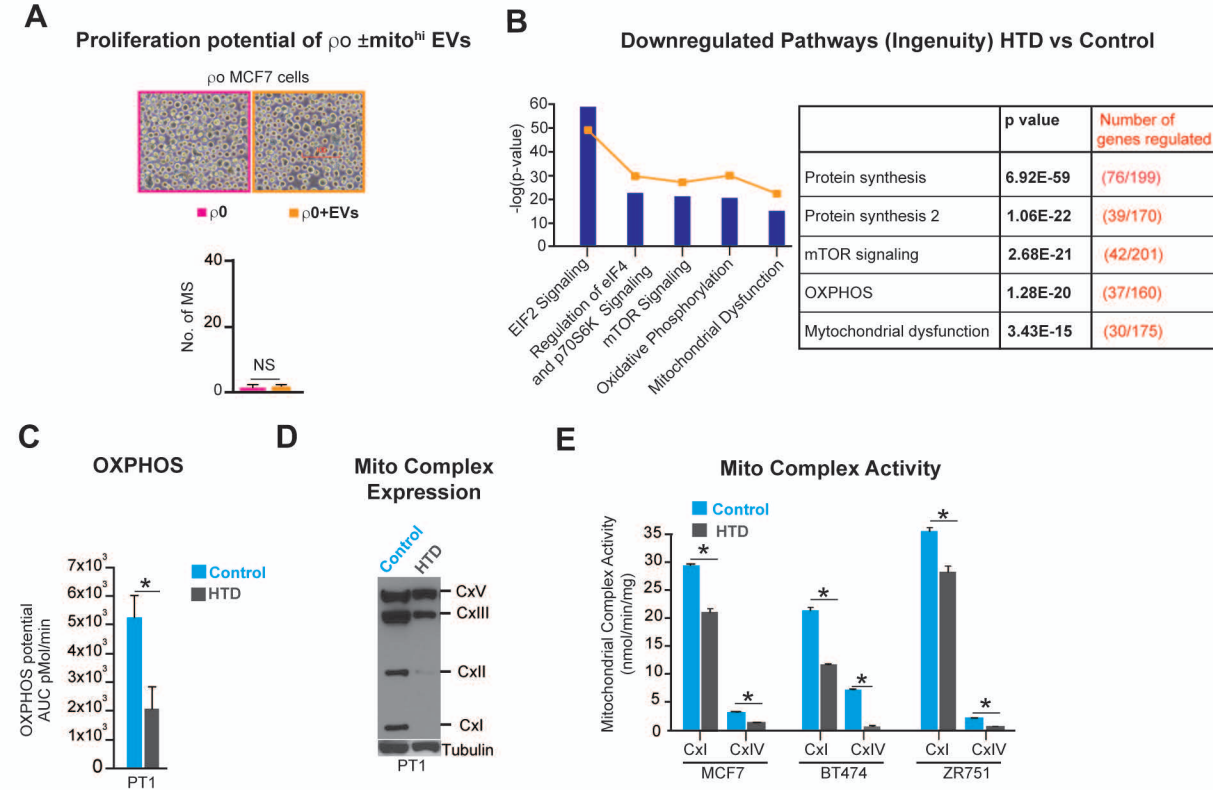

**Fig. S5.** HT induced metabolic dormancy and reduction of mtDNA level.

(A) Representative bright field images of MCF7  $\rho 0$  cells  $\pm$   $\text{mito}^{\text{hi}}$  CAF-EVs ( $3 \times 10^9$ /weekly for 40 days). Bar graph of number of MS is also reported at the endpoint of the experiment (40 days). (B) HT led to decreased expression of mRNA involved in protein synthesis and OXPHOS signaling with z score and  $-\log(p\text{-values})$ - as determined by Ingenuity analysis of microarray data from RNA isolated Fig.5A (MCF7), single P values are also reported. (C) OXPHOS potential determined as changes of respiration rate under mitochondrial stressors by seahorse technology (oligomycin  $1 \mu\text{M}$ , rotenone  $100 \text{ nM}$ ) in cancer cells isolated from Fig.5B (MCF7, PT1). (D) Western Blot analysis of OXPHOS protein cocktail in cells from panel C. (E) Mitochondrial Complex I/IV activity quantification as determined by nmol/min/mg of protein in luminal breast cancer cell lines from panel A. Data are reported as error bars, mean  $\pm$  s.d. of  $n=3$  independent experiments (C, E);  $*P < 0.05$  (Student's t-test).



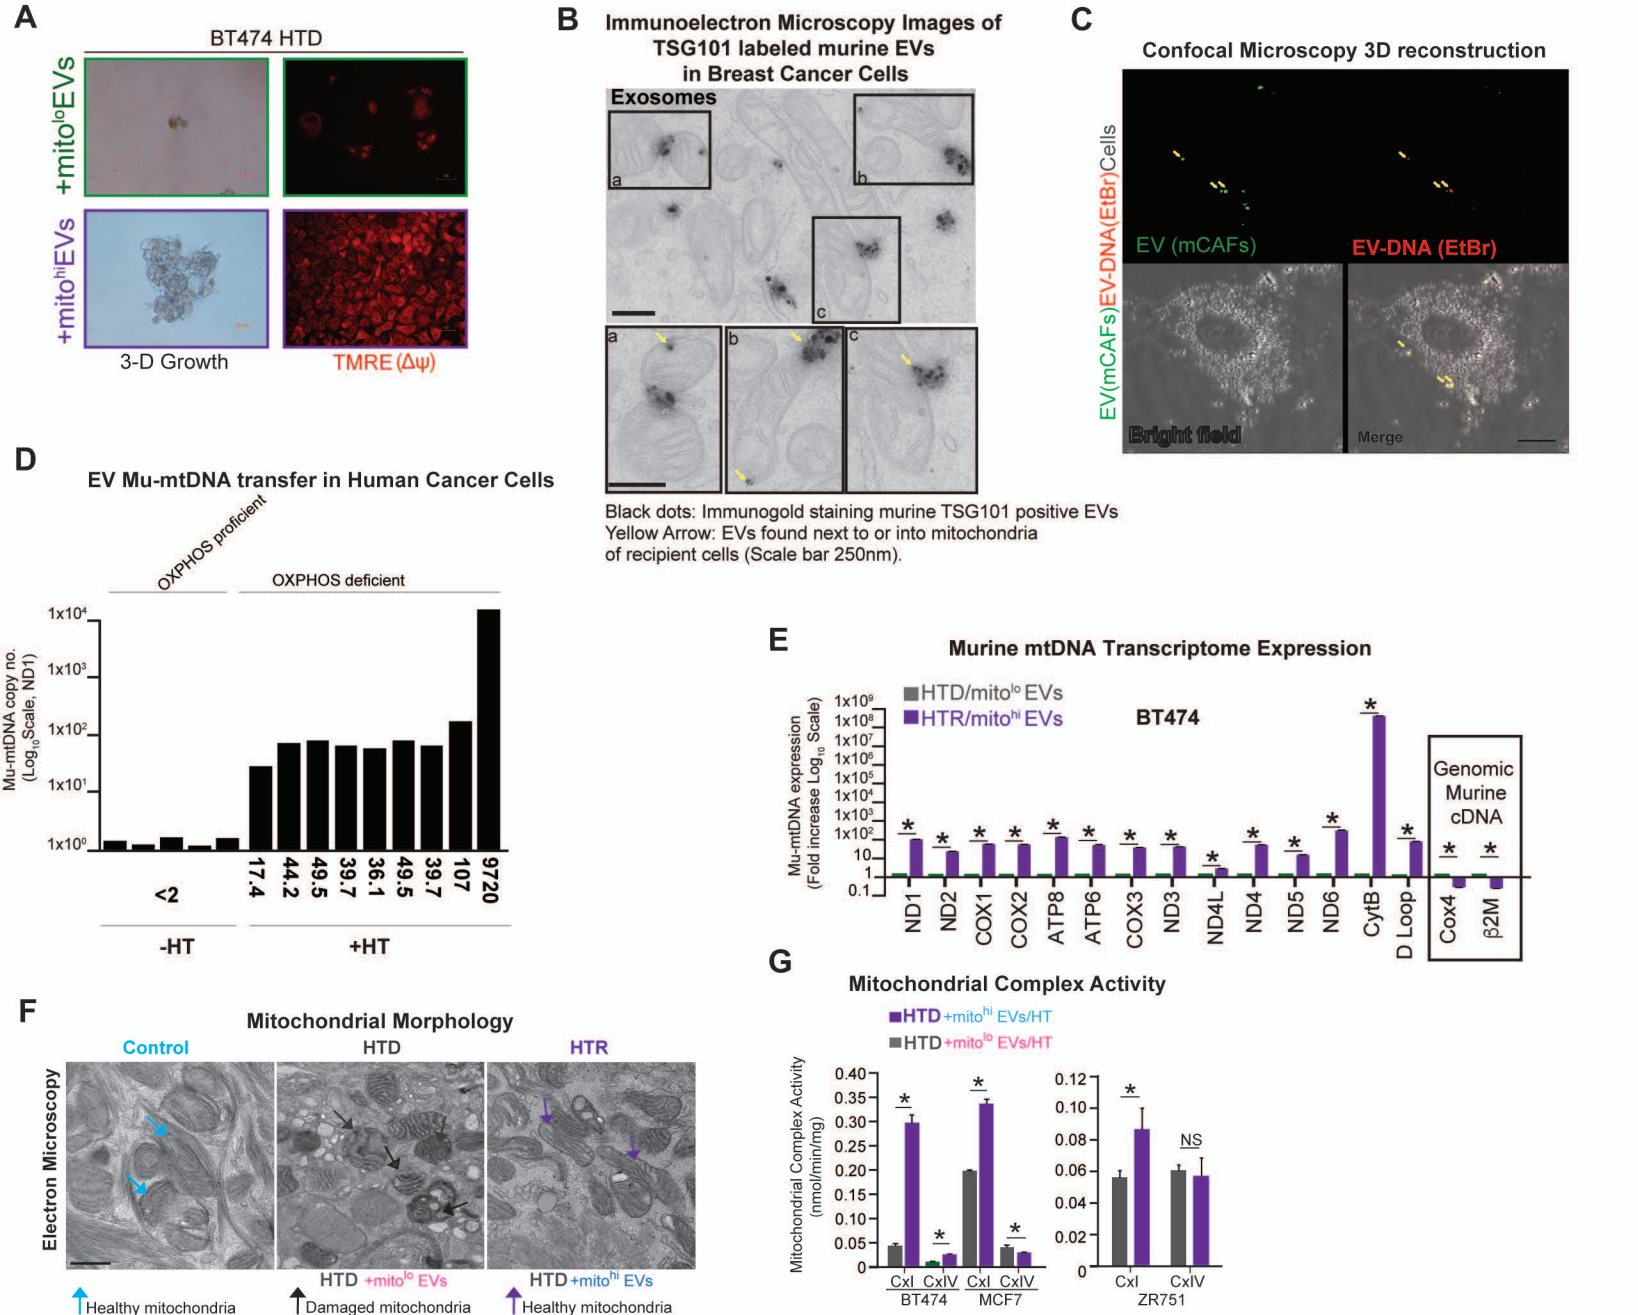

**Fig. S6.** Mito<sup>hi</sup> EV educated HTR cells display proficient mitochondria. (A) Dormant MCF7/BT474 cells (HTD) were isolated (Fig. S5) and treated with  $3 \times 10^9$  mCAF-derived EVs (wt-mtDNA<sup>hi</sup> or p0-mtDNA<sup>lo</sup>) weekly x4. After 40 days, 3D growth as mammosphere (and mitochondrial membrane potential ( $\Delta\psi$ ) by TMRE staining (red) were determined scale bar 100 $\mu$ m. (B) Representative TEM images of a recipient cell cytoplasm (mitochondria rich area, breast cancer cells) following exogenous labeled TSG101 exosome education (murine EV). Immunogold for murine TSG101 was performed (murine TSG101 antibody does not recognize human antigen). Scale bar 250nm (C) Confocal Microscopy images of HTD cells (MCF7) following labeled CAF-EVs administration: CAF-EVs were isolated from  $3 \times 10^9$  mCAFs, labeled with PHK26 green (according to manufacturer's protocol) and EtBr (1.5 ng); PHK26<sup>pos</sup>/EtBr<sup>pos</sup> EVs were administered to cancer cells and 24h later confocal imaging was performed. Yellow arrows show colocalization of DNA and EVs. Scale bar 5 $\mu$ m. (D) Mu-mtDNA copy number (qPCR, ND1) from HTD MCF7 cells (different clones) and controls cultured in vitro and in vivo (MFP) with mCAF-EVs ( $3 \times 10^9$ /weekly/1 month). (E) Murine mitochondrial RNA expression (as fold change -log<sub>10</sub>scale-) by qRT-PCR in HTR and HTS cells (reference HTDorm cells; BT474, see Fig. 5E); the expression of nuclear encoded murine (non-mitochondrial RNA) transcripts was also determined (Cox4,  $\beta$ 2M). (F) Mitochondria morphology as determined by electron microscopy in the MCF7 model: cancer cells in absence of HT (control) and following HT-induced dormancy (HTD)  $\pm$  CAF-EVs (mito<sup>lo</sup> or mito<sup>hi</sup>). Arrows shows damaged (loss of cristae, matrix-dense round mitochondria) and healthy mitochondria ( $\uparrow$ ). Scale bar 200nm. (G) Mitochondrial Complex I/IV activity quantification as determined by nmol/min/mg of protein in luminal breast cancer cell lines from panel a. Data are reported as error bars, mean  $\pm$  s.d. of n=3 independent experiments, \* $P < 0.05$  (Student's t-test).



Murine mtDNA electropherograms  
Human Cancer cells from mtDNA high EVs education

ND1

ND5

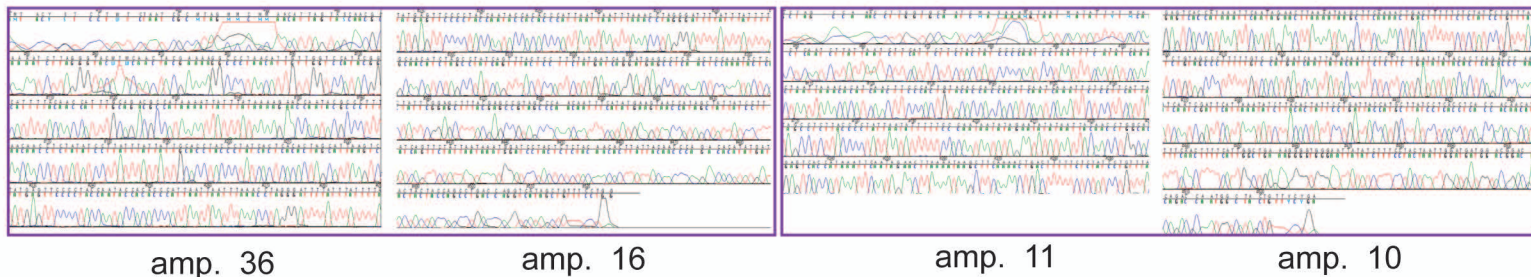

amp. 36

amp. 16

amp. 11

amp. 10

B

Time course culture of Xenograft-derived cancer cells (Fig.5G)

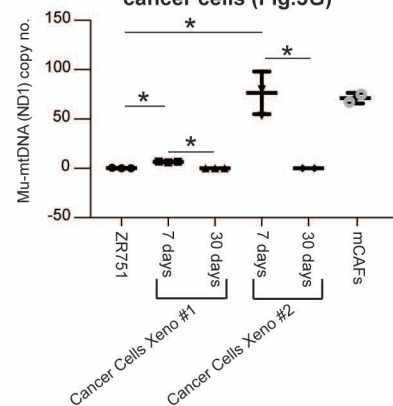

C

HTD + mCAFs Xenografts

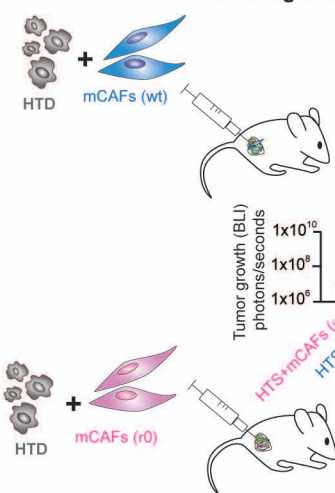

D

Mu-mtDNA in xenograft derived cancer cells

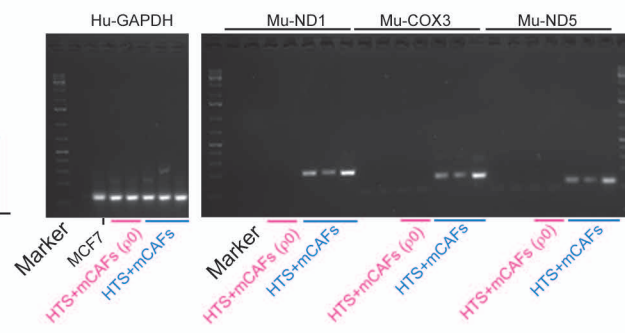

**Fig. S7.** Depletion of mtDNA abrogates the CAF-dependent tumorigenic potential of HTS cells. (A) Representative electropherograms of *ND1* and *ND5* sequences (amplicons 36, 16, 11, 10) derived from whole murine mtDNA sequencing using a set of NumtS (nuclear mitochondrial sequences)-excluding overlapping primers in cancer cells from Figure 5H (see *SI Appendix, Materials and Methods*). (B) Dot plot of murine mtDNA level (*ND1* copy number) from FACS purified cancer cells derived from xenografts tissues of EV-treated mice and cultured *in vitro* for 30 days (2 different examples Xeno#1 and Xeno#2 and control are reported). Data are reported as error bars, mean $\pm$ s.d. of  $n=3$  samples. (C) Schematic of the experimental design: HTS cells (MCF7, Luciferase<sup>pos</sup>) were originated *in vitro* following chronic fulvestrant administration (fulvestrant, 10 $\mu$ M/weekly for 2 months), were injected ( $10^5$ ) into the MFP of mice in presence/absence of mCAFs (wild type or  $\rho 0$ : 1:10=CAFs:MCF7). Tumor growth as BLI mean $\pm$ s.d. was determined at the endpoint of the experiment (5 months from the injection,  $n=10$  mice/group). \* $P<0.05$  (Student's t-test). (D) Murine mtDNA expression as mean $\pm$ s.d. copy number (*ND1*, qPCR) in xenograft derived cancer cells FACS (GFP<sup>+</sup>) isolated at the endpoint of experiment panel C. Representative gel electrophoresis images of murine mtDNA sequences (*ND1*, *COX3*, *ND5*) expressed in tumor cells (distinct lesions) purified via FACS from xenografts (panel C). Data are reported as error bars, mean $\pm$ s.d. of  $n=3$  samples. \* $P<0.05$  (Student's t-test).

**A**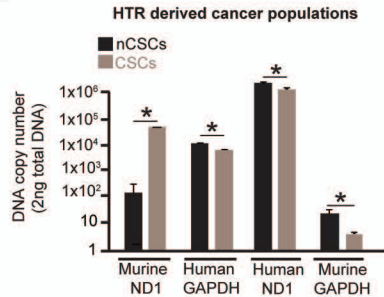**B**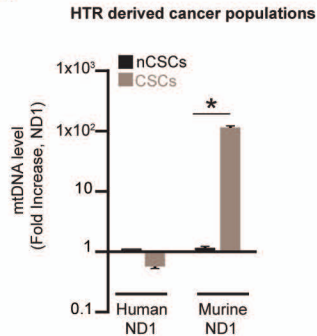

**Fig. S8.** The horizontal transfer of mtDNA occurs in cancer stem cell like cells *in vivo*.

(A) DNA copy number of murine and human mtDNA (*ND1*) and nDNA (*GAPDH*) in nCSCs (CD44<sup>lo</sup>CD133<sup>lo</sup>) and CSCs (CD44<sup>hi</sup>CD133<sup>hi</sup>) derived from HTR MCF7 cells *in vivo*. (B) mtDNA level (qPCR Fold Increase *ND1*, as reference nCSCs-*ND1* level) in nCSCs and CSCs cells from panel A. Data are reported as error bars, mean  $\pm$  s.d. of n=3 samples. \**P*<0.05 (Student's t-test).

**Metastatic evolution of Hormonal Therapy Resistant disease via the horizontal transfer of mtDNA**

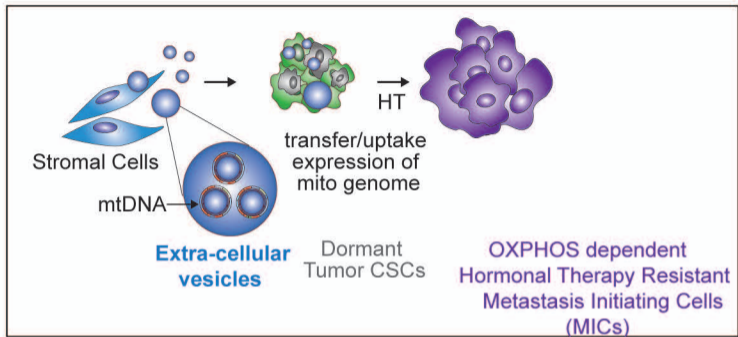

**Fig. S9.** EV-mediated horizontal transfer of mtDNA promotes HTR disease and exit from therapy-induced dormancy. The horizontal transfer of mtDNA promotes hormonal therapy resistance. Extracellular vesicles (EVs) from cancer-associated fibroblasts (CAFs) contain the whole mtDNA genome, which is transferred to HT-derived dormant CSCs promoting mitochondrial activity (OXPHOS) and HTR disease via increased OXPHOS dependent self-renewal of CSCs (metastasis initiating cells, MICs).

Table S1

| HTR<br>Metastatic | Patient #     | Subtype                      | Disease Sites                 | Disease Volume | ND1 C# Mean | ND1 C# STD | GAPDH C# Mean | GAPDH C# STD |
|-------------------|---------------|------------------------------|-------------------------------|----------------|-------------|------------|---------------|--------------|
|                   | 21            | IDC ER70 PR0                 | bone                          | high           | ND          | ND         | 1.08          | 0.50         |
|                   | 2             | ILC ER100 PR50               | pleura, skin                  | low            | 3505.61     | 893.91     | 12.58         | 2.49         |
|                   | 24            | IDC ER90 PR5                 | Liver, bone, LN brain,        | high           | 3006.89     | 188.26     | ND            | ND           |
|                   | 4             | ILC ER50 PR0                 | LN, gastric                   | low            | 2037.19     | 195.66     | 69.79         | 3.76         |
|                   | 5             | IDC ER60 PR0                 | bone, lymph node LN           | high           | 1819.69     | 194.33     | 102.59        | 24.89        |
|                   | 51            | IDC ER80 PR0                 | brain, bone, skin, LN         | high           | 1167.87     | 31.23      | 7.23          | 2.25         |
|                   | 10            | IDC ER80 PR10                | liver, bone                   | high           | 990.82      | 57.42      | 117.19        | 14.26        |
|                   | 35            | IDC ER100 PR50               | plera, bone                   | low            | 837.71      | 188.90     | 1.65          | 0.52         |
|                   | 41            | ILC ER80 PR0                 | orbit, bone, LN               | high           | 834.69      | 177.56     | 1.45          | 0.44         |
|                   | 20            | IDC ER95 PR60                | lung                          | high           | 714.48      | 138.97     | 0.18          | 0.04         |
|                   | 9             | IDC ER30 PR0                 | scalp, liver, bone, LN        | high           | 694.30      | 29.51      | 105.67        | 12.93        |
|                   | 8             | IDC ER80 PR10                | LN, bone, breast              | high           | 519.77      | 23.36      | 767.91        | 116.76       |
|                   | 7             | IDC ER20 PR0                 | bone                          | low            | 417.38      | 6.45       | 103.77        | 15.24        |
|                   | 36            | IDC ER50 PR0                 | skin, liver                   | low            | 390.35      | 15.74      | 7.74          | 1.68         |
|                   | 22            | IDC ER50 PR0                 | Bone, LN                      | low            | 300.99      | 5.77       | ND            | ND           |
|                   | 15            | IDC ER90 PR80                | Bone                          | low            | 247.82      | 20.34      | 76.81         | 6.78         |
|                   | 18            | IDC ER15 PR0                 | liver, pleura, skin, bone, LN | high           | 169.71      | 38.37      | 0.09          | 0.03         |
|                   | 19            | IDC ER80 PR50                | bone, lymph node LN           | low            | 85.30       | 17.75      | 0.26          | 0.04         |
| 17                | IDC ER60 PR5  | pleura, bone, liver          | high                          | 78.38          | 4.52        | 1.02       | 0.33          |              |
| 46                | ILC ER30 PR0  | skin, peritoneum, LN         | low                           | 74.91          | 16.92       | 2.96       | .15           |              |
| 47                | IDC ER80 PR50 | lung, lymph node             | low                           | 10.90          | 3.39        | 1.00       | 0.82          |              |
| 39                | ILC ER60 PR10 | orbit, pleura, bone, gastric | high                          | 3.08           | 0.98        | ND         | ND            |              |

| De Novo<br>Metastatic | Patient # | Subtype        | Disease Sites             | Disease Volume | ND1 C# Mean | ND1 C# STD | GAPDH C# Mean | GAPDH C# STD |
|-----------------------|-----------|----------------|---------------------------|----------------|-------------|------------|---------------|--------------|
|                       | 30        | IDC ER10 PR0   | skin                      | low            | ND          | ND         | ND            | ND           |
|                       | 32        | IDC ER80 PR50  | bone, breast              | high           | 6.22        | 0.24       | 24.04         | 11.23        |
|                       | 38        | IDC ER100 PR10 | breast, bone, LN          | high           | 9.97        | 2.30       | ND            | ND           |
|                       | 40        | ILC ER70PR0    | breast, liver, LN         | high           | 17.05       | 1.46       | 0.88          | 0.86         |
|                       | 37        | IDC ER95 PR0   | LN, gastric, bone, breast | low            | 42.29       | 13.62      | 0.68          | 0.24         |
|                       | 34        | ILC ER80 PR80  | breast, peritoneum, bone  | low            | ND          | ND         | 0.06          | 0.06         |

| Stage 1-2 | Patient #     | Subtype        | ND1 C# Mean | ND1 C# STD | GAPDH C# Mean | GAPDH C# STD |
|-----------|---------------|----------------|-------------|------------|---------------|--------------|
|           | 6             | IDC ER70 PR20  | 7.08        | 4.23       | 1.10          | 0.78         |
|           | 13            | IDC ER100 PR50 | 1.58        | 1.71       | 6.02          | 9.42         |
|           | 16            | IDC ER20 PR0   | ND          | ND         | ND            | ND           |
|           | 23            | IDC ER90 PR90  | 6.31        | 2.69       | ND            | ND           |
|           | 25            | IDC ER100 PR90 | ND          | ND         | ND            | ND           |
|           | 28            | IDC ER50 PR20  | ND          | ND         | ND            | ND           |
|           | 29            | IDC ER80 PR0   | 42.08       | 7.51       | 8.09          | 2.23         |
|           | 31            | IDC ER100 PR70 | ND          | ND         | ND            | ND           |
|           | 41            | IDC ER90 PR80  | 2.83        | 0.47       | 415.96        | 169.74       |
|           | 42            | IDC ER30 PR0   | 8.93        | 3.53       | ND            | ND           |
|           | 49            | IDC ER60 PR10  | 2.77        | 2.35       | 0.35          | 0.19         |
| 52        | IDC ER90 PR60 | ND             | ND          | 0.20       | 0.04          |              |

**Table S1.** EV analysis from patients with HT-resistant (HTR) ER+/HER2- metastatic breast cancer and early stage disease 1. Subtype of Tumor: Invasive Lobular Carcinoma (ILC) or Invasive Ductal Carcinoma (IDC). Estrogen Receptor (ER) and Progesterone Receptor (PR) % Expression. 2. Disease Sites: Organs with metastatic disease. 3. Disease Volume: Low indicates <1% organ involvement; Hi indicates >10% organ involvement. 4. ND1 copy number/10ng of DNA and STD. 5. GAPDH copy number/10ng DNA and STD.

**Table S2**

| <b>Significance:<br/>Mutations</b> | <b>Cell Line</b> | <b>mtDNA position</b> | <b>Present in Evs</b> | <b>Gene</b> | <b>Predicted Functional</b>       |
|------------------------------------|------------------|-----------------------|-----------------------|-------------|-----------------------------------|
|                                    | HTS              | m.3287C>A             | Yes                   | MT-TL1      | associated with encephalomyopathy |
|                                    | HTS              | m.9808C>T             | Yes                   | MT-CO3      | novel, predicted damaging         |
|                                    | HTS              | m.14390C>Y            | Yes                   | MT-ND6      | novel, predicted damaging         |
|                                    | HTR              | m.15598C>Y            | Yes                   | MT-CYB      | novel, synonymous                 |
|                                    | No Therapy       | m.3287C>A             | Yes                   | MT-TL1      | associated with encephalomyopathy |
|                                    | No Therapy       | m.9808C>T             | Yes                   | MT-CO3      | novel, predicted damaging         |
|                                    | No Therapy       | m.14390C>Y            | Yes                   | MT-ND6      | novel, predicted damaging         |
|                                    | HS27             | m.1102A>G             | Yes                   | MT-RNR1     | novel                             |
| HMF                                | none             |                       |                       |             |                                   |

| <b>Significance:<br/>Polymorphisms</b> | <b>Cell Line</b> | <b>mtDNA position</b> | <b>Present in EVs</b> | <b>Gene</b> |
|----------------------------------------|------------------|-----------------------|-----------------------|-------------|
|                                        | HS27             | m.3550G>R             | Yes                   | MT-ND1      |
|                                        | HS27             | m.3741C>T             | Yes                   | MT-ND1      |
|                                        | HS27             | m.5529A>G             | Yes                   | MT-TW       |
|                                        | HS27             | m.8684C>T             | Yes                   | MT-ATP6     |
|                                        | HS27             | m.571C>A              | Yes                   | D-LOOP      |
|                                        | HMF              | m.9150A>G             | Yes                   | MT-ATP6     |
|                                        | HMF              | m.9380G>A             | Yes                   | MT-CO3      |

**Table S2.** Cell line specific mitochondrial DNA variants (mutations and polymorphisms) and their presence in the extracellular vesicles (EVs).

**Table S3.** Mass Spectrometry analysis of mCAF derived EVs.

| Accession                                                            | Description                                                                  | Protein Abundance (Area) | Molecular Function                                                                        |
|----------------------------------------------------------------------|------------------------------------------------------------------------------|--------------------------|-------------------------------------------------------------------------------------------|
| P63260P68033 P62737 E9Q5F4                                           | Actin, cytoplasmic 2,1, aortic smooth muscle, alpha cardiac muscle           | 1.523E10                 | protein binding                                                                           |
| E9PVA8                                                               | Protein Gcn111                                                               | 1.100E10                 | protein binding; RNA binding                                                              |
| Q5SX22                                                               | Polyubiquitin-B (Fragment) OS=Mus musculus GN=Ubb PE=2 SV=2 - [Q5SX22_MOUSE] | 9.567E9                  | protein binding                                                                           |
| Q8BFZ3                                                               | Beta-actin-like protein 2                                                    | 8.967E9                  | nucleotide binding                                                                        |
| P11438 P17047                                                        | Lysosome-associated membrane glycoprotein 2,1                                | 5.754E9                  | protein binding                                                                           |
| P16045 P16110                                                        | Galectin-1,3                                                                 | 4.964E9                  | protein binding; signal transducer activity; RNA binding                                  |
| P41731                                                               | CD63 antigen                                                                 | 4.939E9                  | protein binding                                                                           |
| P70696 P10854 Q8CGP0                                                 | Histone H2B type 1-A, type 1-M, type 3-B                                     | 4.379E9                  | DNA binding; protein binding                                                              |
| F8WIX8 Q8CGP6 Q64522 P0C0S6                                          | Histone H2A, type 1-H, 2-B, Z,                                               | 3.867E9                  | DNA binding; protein binding                                                              |
| P63017                                                               | Heat shock cognate 71 kDa protein                                            | 3.248E9                  | nucleotide binding; protein binding; RNA binding; catalytic activity                      |
| Q3TMX0                                                               | MCG4375, isoform CRA_b                                                       | 3.105E9                  | protein binding                                                                           |
| Q9CQV8-2                                                             | Isoform Short of 14-3-3 protein beta/alpha                                   | 3.003E9                  |                                                                                           |
| P63101 P62259 P68510 P61982 P68254                                   | 14-3-3 protein zeta/delta, gamma, theta, eta, epsilon                        | 2.991E9                  | protein,RNA,and DNA binding                                                               |
| P17182                                                               | Alpha-enolase                                                                | 2.949E9                  | RNA binding; protein binding; metal ion binding                                           |
| P08207 P50543 P97352 P07091 P14069                                   | Protein S100-A10, A11, A13, A4, A6                                           | 2.933E9                  | metal ion binding; protein binding                                                        |
| E9PZ00                                                               | Sulfated glycoprotein 1                                                      | 2.887E9                  | protein binding                                                                           |
| P01831                                                               | Thy-1 membrane glycoprotein                                                  | 2.705E9                  | enzyme regulator activity; protein binding                                                |
| P01942                                                               | Hemoglobin subunit alpha                                                     | 2.622E9                  | antioxidant activity; catalytic activity; transporter activity                            |
| P21956-2                                                             | Isoform 2 of Lactadherin                                                     | 2.540E9                  | metal ion binding; protein binding; protein binding                                       |
| P16858                                                               | Glyceraldehyde-3-phosphate dehydrogenase                                     | 2.517E9                  | catalytic activity; protein binding; nucleotide binding                                   |
| Q62351                                                               | Transferrin receptor protein 1                                               | 2.380E9                  | protein binding; RNA binding; receptor activity; transporter activity; catalytic activity |
| P17156                                                               | Heat shock-related 70 kDa protein 2                                          | 2.222E9                  | nucleotide binding; protein binding                                                       |
| P35762                                                               | CD81 antigen OS                                                              | 2.114E9                  | protein binding                                                                           |
| P40240                                                               | CD9 antigen                                                                  | 2.047E9                  | protein binding                                                                           |
| P52480-2                                                             | Isoform M1 of Pyruvate kinase isozymes M1/M2                                 | 1.898E9                  | nucleotide binding; metal ion binding; catalytic activity                                 |
| P52480                                                               | Pyruvate kinase isozymes M1/M2                                               | 1.898E9                  | protein binding; RNA binding; nucleotide binding; metal ion binding; catalytic activity   |
| P18760 P45591                                                        | Cofilin-1 and2                                                               | 1.800E9                  | protein binding; RNA binding; protein binding                                             |
| F6TFF2                                                               | Pituitary tumor-transforming gene 1 protein-interacting protein (Fragment)   | 1.786E9                  | receptor activity                                                                         |
| P84228 P02301                                                        | Histone H3.2 and 3C                                                          | 1.727E9                  | DNA binding; protein binding                                                              |
| P23242                                                               | Gap junction alpha-1 protein                                                 | 1.726E9                  | signal transducer activity; protein binding; transporter activity                         |
| P62204                                                               | Calmodulin                                                                   | 1.649E9                  | metal ion binding; protein binding; enzyme regulator activity                             |
| P26041                                                               | Moesin                                                                       | 1.508E9                  | RNA binding; protein binding                                                              |
| P05064 A6ZI47 Q9CPQ9                                                 | Fructose-bisphosphate aldolase A, aldolase, aldolase                         | 1.501E9                  | protein binding; catalytic activity; RNA binding                                          |
| Q9D8N0 P10126 P62631 O70251                                          | Elongation factor 1-gamma, beta, alpha 1 and 2                               | 1.486E9                  | RNA binding; protein binding                                                              |
| P11370                                                               | Retrovirus-related Env polyprotein from Fv-4 locus ]                         | 1.480E9                  | structural molecule activity                                                              |
| P97384, P07356, O35639, P97429, P48036 P14824, Q07076, F8WIT2 P10107 | Annexin, A11, A7, A3, A6, A, A4, A1, A5, A2                                  | 1.478E9                  | RNA binding; protein binding; metal ion binding                                           |
| Q9WU78                                                               | Programmed cell death 6-interacting protein                                  | 1.467E9                  | protein binding                                                                           |
| P17742                                                               | Peptidyl-prolyl cis-trans isomerase A                                        | 1.425E9                  | catalytic activity; protein binding; RNA binding                                          |
| Q07797                                                               | Galectin-3-binding protein                                                   | 1.353E9                  | receptor activity; protein binding                                                        |
| Q91XV3                                                               | Brain acid soluble protein 1                                                 | 1.343E9                  | protein binding; DNA binding                                                              |
| F6SJ35                                                               | Protein Gm5068                                                               | 1.275E9                  |                                                                                           |
| Q61696                                                               | Heat shock 70 kDa protein 1A                                                 | 1.262E9                  | nucleotide binding; protein binding; RNA binding; catalytic activity                      |

|                                    |                                                                          |         |                                                                                                        |
|------------------------------------|--------------------------------------------------------------------------|---------|--------------------------------------------------------------------------------------------------------|
| Q9D6P8                             | Calmodulin-like protein 3                                                | 1.260E9 | metal ion binding                                                                                      |
| P08752                             | Guanine nucleotide-binding protein G(i) subunit alpha-2                  | 1.174E9 | nucleotide binding; protein binding; catalytic activity; signal transducer activity; metal ion binding |
| Q64253                             | Lymphocyte antigen 6E                                                    | 1.161E9 |                                                                                                        |
| Q9DC51                             | Guanine nucleotide-binding protein G(k) subunit alpha                    | 1.145E9 | nucleotide binding; protein binding; catalytic activity; signal transducer activity; metal ion binding |
| P18872-2                           | Isoform Alpha-2 of Guanine nucleotide-binding protein G(o) subunit alpha | 1.145E9 | nucleotide binding; catalytic activity; signal transducer activity; protein binding; metal ion binding |
| Q99J93 Q9CQW9                      | Interferon-induced transmembrane protein 2 and 3                         | 1.126E9 |                                                                                                        |
| P20029                             | 78 kDa glucose-regulated protein                                         | 1.109E9 | nucleotide and protein binding; enzyme regulator activity                                              |
| P07901 P11499                      | Heat shock protein HSP 90-alpha and beta                                 | 1.055E9 | nucleotide binding; RNA binding; protein binding; catalytic activity; enzyme regulator activity        |
| P62874 P62880 Q61011               | Guanine nucleotide-binding protein G(l)/G(S)/G(T) subunit beta-1,2,3     | 1.033E9 | protein binding; catalytic activity; signal transducer activity                                        |
| P20065-2                           | Isoform Short of Thymosin beta-4                                         | 1.032E9 | protein binding                                                                                        |
| Q9Z0J0                             | Epididymal secretory protein E1                                          | 1.016E9 | protein binding                                                                                        |
| P26645                             | Myristoylated alanine-rich C-kinase substrate                            | 9.985E8 | protein binding                                                                                        |
| Q9CWJ9                             | Bifunctional purine biosynthesis protein PURH                            | 9.978E8 | catalytic activity; protein binding                                                                    |
| Q3TLP8                             | RAS-related C3 botulinum substrate 1, isoform CRA_a                      | 9.626E8 | nucleotide binding; catalytic activity; protein binding                                                |
| P06151                             | L-lactate dehydrogenase A chain                                          | 9.536E8 | nucleotide binding; catalytic activity; protein binding                                                |
| Q9DCK3 H3BL26                      | Tetraspanin-4, 6 (fragment)                                              | 9.397E8 | protein binding                                                                                        |
| P09411 P09041                      | Phosphoglycerate kinase 1,2                                              | 8.908E8 | nucleotide binding; catalytic activity                                                                 |
|                                    | Histone H4                                                               | 8.877E8 | DNA binding; protein binding; RNA binding                                                              |
| K3W4Q8                             | Basigin                                                                  | 8.733E8 | protein binding                                                                                        |
| Q9DBJ1                             | Phosphoglycerate mutase 1                                                | 8.723E8 | catalytic activity; protein binding                                                                    |
| P63094                             | Guanine nucleotide-binding protein G(s) subunit alpha isoforms short     | 8.676E8 | nucleotide binding; protein binding; catalytic activity; signal transducer activity; metal ion binding |
| P60766                             | Cell division control protein 42 homolog                                 | 8.663E8 | nucleotide binding; catalytic activity; protein binding                                                |
| P34884                             | Macrophage migration inhibitory factor                                   | 8.443E8 | catalytic activity; protein binding                                                                    |
| Q8BFR4                             | N-acetylglucosamine-6-sulfatase                                          | 8.150E8 | catalytic activity; metal ion binding                                                                  |
| P26040                             | Ezrin                                                                    | 8.140E8 | protein binding; RNA binding                                                                           |
| P26043                             | Radixin                                                                  | 8.140E8 | protein binding; RNA binding                                                                           |
| P21550                             | Beta-enolase                                                             | 8.111E8 | metal ion and protein binding; catalytic activity                                                      |
| Q62465                             | Synaptic vesicle membrane protein VAT-1 homolog                          | 7.999E8 | nucleotide binding; metal ion binding; catalytic activity                                              |
| P10852                             | 4F2 cell-surface antigen heavy chain                                     | 7.986E8 | RNA and protein binding                                                                                |
| P62835 Q99JI6 Q80ZJ1 P61226 Q8BU31 | Ras-related protein Rap-1A, 1b, 2a, 2b,2c                                | 7.902E8 | nucleotide binding; catalytic activity; protein binding; transporter activity                          |
| Q6GT24 P35700 Q61171 O08807        | Peroxisome oxidoreductin 6, 1, 2, 4                                      | 7.732E8 | catalytic activity; antioxidant activity; protein binding                                              |
| Q9D379                             | Epoxide hydrolase 1                                                      | 7.597E8 | catalytic activity; protein binding                                                                    |
| A1L317 Q6IFX2                      | Keratin, type I cytoskeletal 24 and 42                                   | 7.269E8 | structural molecule activity                                                                           |
| Q9QUI0                             | Transforming protein RhoA                                                | 7.052E8 | nucleotide binding; catalytic activity; protein binding                                                |
| Q9WV91                             | Prostaglandin F2 receptor negative regulator                             | 6.769E8 | protein binding                                                                                        |
| E9Q616                             | Protein Ahnak                                                            | 6.753E8 | protein binding; RNA binding; structural molecule activity                                             |
| P62962                             | Profilin-1                                                               | 6.702E8 | enzyme regulator activity; nucleotide binding; protein binding; RNA binding                            |
| Q64337-2                           | Isoform 2 of Sequestosome-1                                              | 6.642E8 | protein binding; metal ion binding                                                                     |
| Q64337                             | Sequestosome-1                                                           | 6.642E8 | protein binding; metal ion binding                                                                     |
| Q9JJ00 Q9JIZ9                      | Phospholipid scramblase 3, 1                                             | 6.342E8 | protein binding; transporter activity                                                                  |
| P10605 P18242 Q9WUU7               | Cathepsin B, D, Z                                                        | 6.340E8 | catalytic activity; protein binding                                                                    |
| Q9R0P5                             | Dextrin                                                                  | 6.082E8 | protein binding                                                                                        |
| P58252                             | Elongation factor 2                                                      | 5.947E8 | nucleotide binding; RNA binding; catalytic activity; protein binding; translation regulator activity   |



|                                                                                                                                                                                                  |                                                                                                                         |         |                                                                                                   |
|--------------------------------------------------------------------------------------------------------------------------------------------------------------------------------------------------|-------------------------------------------------------------------------------------------------------------------------|---------|---------------------------------------------------------------------------------------------------|
| Q9R0P3                                                                                                                                                                                           | S-formylglutathione hydrolase                                                                                           | 5.945E8 | catalytic activit                                                                                 |
| Q60932-2                                                                                                                                                                                         | Isoform Mt-VDAC1 of Voltage-dependent anion-selective channel protein 1                                                 | 5.905E8 | nucleotide binding; transporter activity; protein binding;                                        |
| P53986 P57787                                                                                                                                                                                    | Monocarboxylate transporter 1,4                                                                                         | 5.735E8 | transporter activity; protein binding;                                                            |
| P10649 P15626 E9PV63                                                                                                                                                                             | Glutathione S-transferase Mu 1, Mu 2, Mu 5                                                                              | 5.580E8 | catalytic activity; protein binding; metal ion binding;                                           |
| P17751                                                                                                                                                                                           | Triosephosphate isomerase                                                                                               | 5.464E8 | catalytic activity; protein binding;                                                              |
| Q8VDN2 Q6PIC6 Q9WV27 P97370                                                                                                                                                                      | Sodium/potassium-transporting ATPase subunit alpha-1, alpha-3, alpha-4, beta-3                                          | 5.344E8 | nucleotide binding; catalytic activity; transporter activity; protein binding; metal ion binding; |
| E9PYB0 F7CVJ5 F7DBB3                                                                                                                                                                             | Protein Ahnak2 (Fragment) (x3)                                                                                          | 5.330E8 | protein binding;                                                                                  |
| P15532 E9PZF0                                                                                                                                                                                    | Nucleoside diphosphate kinase, A                                                                                        | 5.243E8 | nucleotide binding; catalytic activit                                                             |
| P17183                                                                                                                                                                                           | Gamma-enolase                                                                                                           | 5.055E8 | metal ion binding; catalytic activity; protein binding;                                           |
| P62746 Q62159 P84096 Q8R527                                                                                                                                                                      | Rho-related GTP-binding protein RhoB,Q,C,J,G                                                                            | 5.054E8 | nucleotide binding; protein binding;                                                              |
| Q8R366                                                                                                                                                                                           | Immunoglobulin superfamily member 8                                                                                     | 5.001E8 | protein binding;                                                                                  |
| A2A839 P54116                                                                                                                                                                                    | Erythrocyte protein band 4.1 and 7 integral membrane                                                                    | 4.883E8 | protein binding; structural molecule activit                                                      |
| P21278<br>P27601<br>P30677<br>P68040<br>P29387                                                                                                                                                   | Guanine nucleotide-binding protein subunit beta-2-like 1,beta-1,beta-4, alpha-13,alpha-11,alpha-14                      | 4.829E8 | RNA binding;                                                                                      |
| Q9WVK4Q8BH64<br>Q9QXY6                                                                                                                                                                           | EH domain-containing protein 1,2,3                                                                                      | 4.803E8 | nucleotide binding; catalytic activity; metal ion binding; protein binding;                       |
| G3UX26                                                                                                                                                                                           | Voltage-dependent anion-selective channel protein 2 (Fragment)                                                          | 4.803E8 | transporter activit                                                                               |
| P15379-2                                                                                                                                                                                         | Isoform 13 of CD44 antigen                                                                                              | 4.764E8 | catalytic activity; receptor activity; signal transduce activity; protein binding;                |
| Q8R2Q8                                                                                                                                                                                           | Bone marrow stromal antigen 2                                                                                           | 4.750E8 | RNA and protein binding;                                                                          |
| P61027 P62492 P46638 Q9DD03 Q91V41<br>P35293 P62821<br>Q9D1G1 P35282 P35285 P53994 Q921E2<br>Q6PHN9 D3YWL1<br>Q8CG50 P56371 Q91ZR1 Q9CQD1 P61021<br>P35278 P35279<br>P51150 P55258 P61028 Q9R0M6 | Ras-related protein Rab-22A, 43, 1A, 8A, 8B, 1B, 10, 35, 4A, 3D (FRAG), 4B, 13,21,18,11A,11B,14,5C,5B,5A,6A,9A,2A,31,7A | 4.665E8 | nucleotide binding; catalytic activity; protein binding;                                          |
| Q99PT1                                                                                                                                                                                           | Rho GDP-dissociation inhibitor 1                                                                                        | 4.634E8 | enzyme regulator activity; protein binding;                                                       |
| P04104 Q6IFZ6 Q3UV17 Q8VED5                                                                                                                                                                      | Keratin, type II cytoskeletal 1, 1b, 2 oral, 79                                                                         | 4.588E8 | structural molecule activit                                                                       |
| G3XA41                                                                                                                                                                                           | MCG50219                                                                                                                | 4.517E8 |                                                                                                   |
| P11276                                                                                                                                                                                           | Fibronectin                                                                                                             | 4.490E8 | protein binding; enzyme regulator activity; metal ion binding;                                    |
| Q9DAS9                                                                                                                                                                                           | Guanine nucleotide-binding protein G(I)/G(S)/G(O) subunit gamma-12                                                      | 4.410E8 | signal transducer activity; protein binding;                                                      |
| P16675 Q35114                                                                                                                                                                                    | Lysosomal protective protein and membrane protein 2                                                                     | 4.408E8 | catalytic activity; protein binding;                                                              |
| Q9CYL5                                                                                                                                                                                           | Golgi-associated plant pathogenesis-related protein 1                                                                   | 4.264E8 | protein binding;                                                                                  |
| Q9ER71-2                                                                                                                                                                                         | Isoform 2 of Rho-related GTP-binding protein RhoJ                                                                       | 4.255E8 | nucleotide binding; catalytic activity; protein binding;                                          |
| Q9ERD7 P68372 P99024 Q922F4                                                                                                                                                                      | Tubulin beta-3, 4B, 5, 6 chains                                                                                         | 4.216E8 | nucleotide binding; catalytic activity; structural molecule activity; protein binding;            |
| Q8VEH3, Q9CQW2                                                                                                                                                                                   | ADP-ribosylation factor-like protein 8A and 8B                                                                          | 4.212E8 | nucleotide binding;                                                                               |
| Q9CZR2                                                                                                                                                                                           | N-acetylated-alpha-linked acidic dipeptidase 2 USEJ                                                                     | 4.190E8 | catalytic activity; metal ion binding;                                                            |
| P13020-2                                                                                                                                                                                         | Isoform 2 of Gelsolin                                                                                                   | 4.176E8 | protein binding; metal ion binding;                                                               |
| P08113                                                                                                                                                                                           | Endoplasmin                                                                                                             | 4.126E8 | nucleotide binding; RNA binding; protein binding;                                                 |
| O09131 P19157                                                                                                                                                                                    | Glutathione S-transferase omega-1, P1                                                                                   | 4.094E8 | catalytic activity; protein binding; antioxidant activit                                          |
| J3QPE8                                                                                                                                                                                           | MCG16555                                                                                                                | 4.090E8 | transporter activit                                                                               |
| Q9CX00                                                                                                                                                                                           | IST1 homolog                                                                                                            | 4.080E8 | protein binding;                                                                                  |
| P09528                                                                                                                                                                                           | Ferritin heavy chain                                                                                                    | 3.858E8 | catalytic activity; metal ion binding;                                                            |
| P15864P43277 P43274                                                                                                                                                                              | Histone H1.4,3,2                                                                                                        | 3.766E8 | DNA binding; protein binding; RNA binding;                                                        |
| Q9EQK5 E9Q3X0                                                                                                                                                                                    | Major vault protein (x2)                                                                                                | 3.691E8 | protein binding;                                                                                  |
| P50396 Q61598                                                                                                                                                                                    | Rab GDP dissociation inhibitor alpha, beta                                                                              | 3.678E8 | enzyme regulator activity; protein binding;                                                       |
| Q61753                                                                                                                                                                                           | D-3-phosphoglycerate dehydrogenase                                                                                      | 3.639E8 | nucleotide binding; catalytic activit                                                             |

|                              |                                                       |         |                                                                                                                                           |
|------------------------------|-------------------------------------------------------|---------|-------------------------------------------------------------------------------------------------------------------------------------------|
| Q60605                       | Myosin light polypeptide 6                            | 3.620E8 | catalytic activity; motor activity; metal ion binding; protein binding; structural molecule activity; protein binding; catalytic activity |
| P24638                       | Lysosomal acid phosphatase                            | 3.582E8 |                                                                                                                                           |
| Q6IRU2 P68373                | Tropomyosin alpha-4, IC chains                        | 3.548E8 | protein binding; metal ion binding                                                                                                        |
| Q60854                       | Serpin B6                                             | 3.540E8 | protein binding; enzyme regulator activity                                                                                                |
| O70404                       | Vesicle-associated membrane protein 8                 | 3.523E8 | protein binding                                                                                                                           |
| Q9Z1Q5 Q9QYB1 Q8BXX9         | Chloride intracellular channel protein 1,4,5          | 3.455E8 | transporter activity; protein binding                                                                                                     |
| O88342                       | WD repeat-containing protein 1                        | 3.426E8 | protein binding                                                                                                                           |
| O08917                       | Flotillin-1                                           | 3.422E8 | protein binding                                                                                                                           |
| Q6ZQ38                       | Cullin-associated NEDD8-dissociated protein 1         | 3.406E8 | protein binding                                                                                                                           |
| P70296                       | Phosphatidylethanolamine-binding protein 1            | 3.399E8 | nucleotide binding; enzyme regulator activity; protein binding; RNA binding                                                               |
| Q60648                       | Ganglioside GM2 activator                             | 3.351E8 | catalytic activity; transporter activity; enzyme regulator activity                                                                       |
| P20152                       | Vimentin                                              | 3.324E8 | protein binding; RNA binding; structural molecule activity                                                                                |
| P10639                       | Thioredoxin                                           | 3.307E8 | protein binding; catalytic activity; RNA binding                                                                                          |
| A1BN54P57780                 | Alpha actinin 1a and 4                                | 3.292E8 | RNA binding; protein binding; metal ion binding                                                                                           |
| O35604                       | Niemann-Pick C1 protein                               | 3.275E8 | transporter activity; protein binding; receptor activity; signal transducer activity                                                      |
| P40124                       | Adenylyl cyclase-associated protein 1                 | 3.273E8 | protein binding                                                                                                                           |
| A2AKI5 P11688 P09055         | Integrin alpha V, alpha 5, beta-1                     | 3.211E8 | protein binding; transporter activity; metal ion binding                                                                                  |
| P40237                       | CD82 antigen                                          | 3.140E8 |                                                                                                                                           |
| F6VRP8                       | Galectin-3-binding protein (Fragment)                 | 3.094E8 | receptor activity; protein binding                                                                                                        |
| P06745                       | Glucose-6-phosphate isomerase                         | 3.058E8 | catalytic activity; protein binding                                                                                                       |
| P62965                       | Cellular retinoic acid-binding protein 1              | 3.057E8 | transporter activity                                                                                                                      |
| G3UZ34                       | 116 kDa U5 small nuclear ribonucleoprotein component  | 3.051E8 | nucleotide binding; catalytic activity                                                                                                    |
| Q62426                       | Cystatin-B                                            | 3.042E8 | protein binding; enzyme regulator activity; RNA binding                                                                                   |
| P68368                       | Tubulin alpha-4A chain                                | 3.008E8 |                                                                                                                                           |
| Q9CPX4                       | Ferritin                                              | 2.978E8 | metal ion binding; protein binding                                                                                                        |
| P14211                       | Calreticulin                                          | 2.909E8 | protein binding; RNA binding; metal ion binding                                                                                           |
| O54962                       | Barrier-to-autointegration factor                     | 2.891E8 | DNA binding                                                                                                                               |
| Q91VR7                       | Microtubule-associated proteins 1A/1B light chain 3A  | 2.877E8 | protein binding                                                                                                                           |
| P45376                       | Aldose reductase                                      | 2.853E8 | catalytic activity                                                                                                                        |
| Q9Z127                       | Large neutral amino acids transporter small subunit 1 | 2.850E8 | transporter activity                                                                                                                      |
| O35566                       | CD151 antigen                                         | 2.848E8 | protein binding                                                                                                                           |
| Q68FD5                       | Clathrin heavy chain 1                                | 2.791E8 | RNA binding; structural molecule activity; protein binding                                                                                |
| F6SAC3                       | Glucose-6-phosphate isomerase                         | 2.778E8 | catalytic activity                                                                                                                        |
| Q61187                       | Tumor susceptibility gene 101 protein                 | 2.722E8 | protein binding                                                                                                                           |
| P84084, P84078 Q8BSL7 P61750 | ADP-ribosylation factor 5,4,2,1                       | 2.674E8 | nucleotide and protein binding; signal transducer activity                                                                                |
| Q9ET22                       | Dipeptidyl peptidase 2                                | 2.637E8 | catalytic activity                                                                                                                        |
| J3QP68                       | Uncharacterized protein                               | 2.623E8 |                                                                                                                                           |
| P63028                       | Translationally-controlled tumor protein              | 2.591E8 | metal ion binding; protein binding; RNA binding                                                                                           |
| Q05816                       | Fatty acid-binding protein, epidermal                 | 2.583E8 | transporter activity                                                                                                                      |
| Q3UW53                       | Protein Niban                                         | 2.579E8 |                                                                                                                                           |
| O70318                       | Band 4.1-like protein 2                               | 2.560E8 | protein binding; structural molecule activity                                                                                             |
| P50516                       | V-type proton ATPase catalytic subunit A              | 2.551E8 | nucleotide binding; catalytic activity; transporter activity                                                                              |
| Q920A5                       | Retinoid-inducible serine carboxypeptidase            | 2.538E8 | catalytic activity                                                                                                                        |
| P63242                       | Eukaryotic translation initiation factor 5A-1         | 2.513E8 | RNA binding; protein binding                                                                                                              |

|                                             |                                                                             |         |                                                                                                                                        |
|---------------------------------------------|-----------------------------------------------------------------------------|---------|----------------------------------------------------------------------------------------------------------------------------------------|
| Q9WV92-3                                    | Isoform 3 of Band 4.1-like protein 3                                        | 2.484E8 | protein binding; structural molecule activit                                                                                           |
| Q9WV92-7                                    | Isoform 7 of Band 4.1-like protein 3                                        | 2.484E8 | protein binding; structural molecule activit                                                                                           |
| Q9WV92-8                                    | Isoform 8 of Band 4.1-like protein 3                                        | 2.484E8 | protein binding; structural molecule activit                                                                                           |
| P99029                                      | Peroxisredoxin-5, mitochondrial                                             | 2.435E8 | DNA binding; antioxidant activity; catalytic activity; protei<br>binding; enzyme regulator activit                                     |
| A2AUE1                                      | DnaJ (Hsp40) homolog, subfamily C, member 5 (Fragment)                      | 2.435E8 | protein binding;                                                                                                                       |
| P46467 Q8VEJ9 Q9EQH3 D3Z645 Q9D1C8          | Vacuolar protein sorting-associated protein 4A, 4B, 28 (homolog),<br>29, 35 | 2.430E8 | nucleotide binding; catalytic activity; RNA binding; protei<br>binding;                                                                |
| O89051                                      | Integral membrane protein 2B                                                | 2.411E8 | protein binding; nucleotide bindin;                                                                                                    |
| Q921W0 Q99LU0Q9CQD4 Q9DB34 Q9D8B3<br>Q9D7S9 | Charged multivesicular body protein 1a, 4b, 1b-1.5,1b02.2a                  | 2.399E8 | protein bindin;                                                                                                                        |
| Q9DCD6 Q8R3R8 P60521                        | Gamma-aminobutyric acid receptor-associated protein, like 1 and 2           | 2.393E8 | protein bindin;                                                                                                                        |
| P10833 P62071                               | Ras-related protein R-Ras, 2                                                | 2.378E8 | nucleotide binding; catalytic activity; protein bindin;                                                                                |
| Q9WTI7-2                                    | Isoform 2 of Unconventional myosin-Ic                                       | 2.354E8 | catalytic activity; motor activity; nucleotide binding; protei<br>binding;                                                             |
| Q80X71 F8WHW3                               | Transmembrane protein 106B,55B                                              | 2.341E8 | catalytic activit                                                                                                                      |
| P29416, P20060                              | Beta-hexosaminidase subunit alpha and beta                                  | 2.336E8 | catalytic activity; protein bindin;                                                                                                    |
| P21279                                      | Guanine nucleotide-binding protein G(q) subunit alpha                       | 2.325E8 | nucleotide binding; protein binding; catalytic activity; signa<br>transducer activity; enzyme regulator activity; metal ion<br>bindin; |
| P21995                                      | Embigin                                                                     | 2.321E8 | protein bindin;                                                                                                                        |
| Q9R0Q7                                      | Prostaglandin E synthase 3                                                  | 2.315E8 | protein binding; catalytic activit                                                                                                     |
| P39688 E9QPE2 Q04736                        | Tyrosine-protein kinase Yes, receptor , and Fyn                             | 2.300E8 | nucleotide binding; catalytic activity; protein bindin;                                                                                |
| P63321Q9JIW9                                | Ras-related protein Ral-A , B                                               | 2.288E8 | nucleotide binding; catalytic activity; protein bindin;                                                                                |
| Q61735                                      | Leukocyte surface antigen CD47                                              | 2.288E8 | protein binding; receptor activity; signal transducer activit                                                                          |
| P47757-2                                    | Isoform 2 of F-actin-capping protein subunit beta                           | 2.272E8 | protein bindin;                                                                                                                        |
| P49817                                      | Caveolin-1                                                                  | 2.271E8 | structural molecule and catalytic activitt                                                                                             |
| P49817-2                                    | Isoform Beta of Caveolin-1                                                  | 2.271E8 | protein binding; catalytic activity; structural molecul<br>activity; enzyme regulator activit                                          |
| F8WJK8                                      | Hsc70-interacting protein                                                   | 2.270E8 | protein bindin;                                                                                                                        |
| Q9WV54                                      | Acid ceramidase                                                             | 2.239E8 | catalytic activit                                                                                                                      |
| Q9ESU7                                      | Neutral amino acid transporter ASCT2                                        | 2.230E8 | transporter activit                                                                                                                    |
| Q61792                                      | LIM and SH3 domain protein 1                                                | 2.228E8 | protein binding; metal ion binding; transporter activit                                                                                |
| P31786                                      | Acyl-CoA-binding protein                                                    | 2.192E8 | protein bindin;                                                                                                                        |
| O88947                                      | Coagulation factor X                                                        | 2.170E8 | catalytic activity; metal ion binding; protein bindin;                                                                                 |
| P08556                                      | GTPase NRas                                                                 | 2.136E8 | nucleotide binding; catalytic activity; transporter activity<br>protein bindin;                                                        |
| P16460                                      | Argininosuccinate synthase                                                  | 2.127E8 | RNA binding; protein binding; metal ion bindin;                                                                                        |
| Q9WV32, P61161, Q9CVB6, Q9JM76              | Actin-related protein 2/3 complex subunit 1B, 2, 3                          | 2.123E8 | structural molecule activit                                                                                                            |
| P01899 P01902                               | H-2 class I histocompatibility antigen, D-B alpha chain, K-D alpha<br>chain | 2.120E8 | protein binding; RNA bindin;                                                                                                           |
| Q3TCN2                                      | Putative phospholipase B-like 2                                             | 2.100E8 | catalytic activit                                                                                                                      |
| Q9QZC7                                      | Pleckstrin homology domain-containing family B member 2                     | 2.090E8 | protein bindin;                                                                                                                        |
| P11983 P80314 P80315 P80313 P42932          | T-complex protein 1 subunit delta, beta, theta, eta, alpha                  | 2.087E8 | nucleotide binding; protein binding; RNA bindin;                                                                                       |
| Q61990-2                                    | Isoform 2 of Poly(rC)-binding protein 2                                     | 2.077E8 | DNA binding; RNA binding; protein bindin;                                                                                              |
| Q9QWR8                                      | Alpha-N-acetylgalactosaminidase                                             | 2.069E8 | catalytic activity; protein bindin;                                                                                                    |
| P62774                                      | Myotrophin                                                                  | 2.056E8 | protein binding; DNA bindin;                                                                                                           |
| P40142                                      | Transketolase                                                               | 2.052E8 | metal ion binding; catalytic activity; protein bindin;                                                                                 |
| P27773 P09103                               | Protein disulfide-isomerase, A3                                             | 2.049E8 | catalytic activity; metal ion binding; protein binding; RN/<br>bindin;                                                                 |
| P58774-2                                    | Isoform 2 of Tropomyosin beta chain                                         | 2.034E8 | protein binding; structural molecule activit                                                                                           |
| P50428, P50429                              | Arylsulfatase A and B                                                       | 2.017E8 | catalytic activity; metal ion bindin;                                                                                                  |
| Q01853                                      | Transitional endoplasmic reticulum ATPase                                   | 2.012E8 | nucleotide binding; catalytic activity; RNA binding; protei                                                                            |

|                      |                                                                   |         |                                                                |
|----------------------|-------------------------------------------------------------------|---------|----------------------------------------------------------------|
|                      |                                                                   |         | binding; enzyme regulator activit                              |
| Q8C129               | Leucyl-cystinyl aminopeptidase                                    | 2.008E8 | receptor activity; signal transducer activity; catalyti        |
| O89023               | Tripeptidyl-peptidase 1                                           | 2.008E8 | activity; protein binding; metal ion binding                   |
| Q9D1A2               | Cytosolic non-specific dipeptidase                                | 2.006E8 | catalytic activity; protein binding; metal ion binding         |
| Q8BH40 Q9ER005       | Syntaxin 7, 12                                                    | 1.992E8 | protein binding                                                |
| P60335               | Poly(rC)-binding protein 1                                        | 1.974E8 | DNA binding; RNA binding; protein binding; translation         |
| Q9CQ22 O88653 Q9D1L9 | Ragulator complex protein LAMTOR1,3,5                             | 1.969E8 | regulator activit                                              |
| P51655               | Glypican-4                                                        | 1.965E8 | protein binding; structural molecule activit                   |
| P63037 Q9QYJ0        | DnaJ homolog subfamily A member 1, 2                              | 1.955E8 | protein binding; nucleotide binding; metal ion binding         |
| P32883-2             | Isoform 2B of GTPase KRas                                         | 1.923E8 | nucleotide binding; catalytic activity; protein binding        |
| E9Q9C5               | V-type proton ATPase 16 kDa proteolipid subunit (Fragment)        | 1.914E8 | transporter activit                                            |
| P20352               | Tissue factor                                                     | 1.905E8 | protein binding; catalytic activity; transporter activit       |
| O88952               | Protein lin-7 homolog C                                           | 1.900E8 | protein binding; receptor activity; signal transducer activit  |
| G5E829               | MCG13663, isoform CRA_a                                           | 1.896E8 | protein binding                                                |
| Q9WVJ3-2             | Isoform 2 of Carboxypeptidase Q                                   | 1.871E8 | nucleotide binding; catalytic activity; transporter activity   |
| Q9R118               | Serine protease HTRA1                                             | 1.849E8 | protein binding; metal ion binding                             |
| Q9DCD0               | 6-phosphogluconate dehydrogenase, decarboxylating                 | 1.823E8 | catalytic activit                                              |
| Q8BP47               | Asparagine--tRNA ligase, cytoplasmic                              | 1.823E8 | nucleotide binding; catalytic activit                          |
| Q78ZA7               | Nucleosome assembly protein 1-like 4                              | 1.813E8 | RNA binding                                                    |
| Q00780               | Collagen alpha-1(VIII) chain                                      | 1.799E8 | protein binding                                                |
| Q8BGQ7               | Alanine--tRNA ligase, cytoplasmic                                 | 1.798E8 | RNA, nucleotide,protein and metal ion binding                  |
| Q9DCN2-2             | Isoform 2 of NADH-cytochrome b5 reductase 3                       | 1.793E8 | catalytic activity; protein binding; nucleotide binding        |
| Q9JII6               | Alcohol dehydrogenase [NADP(+)]                                   | 1.755E8 | catalytic activit                                              |
| Q64727               | Vinculin                                                          | 1.751E8 | protein binding; catalytic activity; structural molecul        |
| D3Z2H9               | Uncharacterized protein                                           | 1.737E8 | activit                                                        |
| P47754               | F-actin-capping protein subunit alpha-2                           | 1.733E8 | protein binding                                                |
| Q69ZN7 E9Q390        | Myoferlin (x2)                                                    | 1.725E8 | protein binding                                                |
| Q6P9J9               | Anoctamin-6                                                       | 1.711E8 | transporter activity; protein binding                          |
| Q8K2Q7               | BRO1 domain-containing protein BROX                               | 1.689E8 |                                                                |
| P62827               | GTP-binding nuclear protein Ran                                   | 1.681E8 | nucleotide binding; catalytic activity; protein binding; RN/   |
| G5E8R0               | Tropomyosin 1, alpha, isoform CRA_i                               | 1.669E8 | binding                                                        |
| Q8K0Z5               | Tropomyosin 3, gamma                                              | 1.669E8 | protein binding; structural molecule activit                   |
| P08228               | Superoxide dismutase [Cu-Zn]                                      | 1.647E8 | protein binding                                                |
| P17809               | Solute carrier family 2, facilitated glucose transporter member 1 | 1.589E8 | antioxidant activity; catalytic activity; metal ion binding    |
| Q9R0Y5               | Adenylate kinase isoenzyme 1                                      | 1.589E8 | protein binding                                                |
| Q6P069-2             | Isoform 2 of Sorcin ]                                             | 1.582E8 | transporter activity; protein binding                          |
| Q8VEM8               | Phosphate carrier protein, mitochondrial                          | 1.554E8 | nucleotide binding; catalytic activit                          |
| Q99JY9               | Actin-related protein 3                                           | 1.547E8 | protein binding; catalytic activity; metal ion binding         |
| Q8VDD5               | Myosin-9                                                          | 1.546E8 | transporter activity; protein binding                          |
| Q9WVA4               | Transgelin-2                                                      | 1.531E8 | nucleotide and protein binding                                 |
| Q91YR1               | Twinfilin-1                                                       | 1.524E8 | catalytic activity; motor activity; nucleotide binding; protei |
| Q8VHX6-2             | Isoform 2 of Filamin-C                                            | 1.518E8 | binding; RNA binding                                           |
| Q6ZWQ5 Q78ZM0        | Sorting nexin 12,3                                                | 1.497E8 | protein binding                                                |
|                      |                                                                   |         | protein binding                                                |

|                            |                                                                   |         |                                                                                                                      |
|----------------------------|-------------------------------------------------------------------|---------|----------------------------------------------------------------------------------------------------------------------|
| B7FAU9                     | Filamin, alpha                                                    | 1.494E8 | protein binding; signal transducer activity; RNA binding                                                             |
| Q8CI59                     | Metalloreductase STEAP3                                           | 1.475E8 | nucleotide binding; catalytic activity; metal ion binding                                                            |
| P70349                     | Histidine triad nucleotide-binding protein 1                      | 1.431E8 | nucleotide binding; catalytic activity                                                                               |
| Q3UKC1                     | Tax1-binding protein 1 homolog                                    | 1.423E8 | catalytic activity; motor activity; protein binding; metal ion binding                                               |
| P57776-2                   | Isoform 2 of Elongation factor 1-delta                            | 1.410E8 | RNA binding                                                                                                          |
| P50518 P51863 P62814       | V-type proton ATPase subunit E 1, D1, B1 brain isoform            | 1.393E8 | protein binding; catalytic activity; transporter activity                                                            |
| Q8BH78                     | RTN4                                                              | 1.383E8 | protein binding; RNA binding                                                                                         |
| P70168                     | Importin subunit beta-1                                           | 1.381E8 | protein binding; transporter activity; RNA binding                                                                   |
| O35598                     | Disintegrin and metalloproteinase domain-containing protein 10    | 1.380E8 | catalytic activity; protein binding; metal ion binding                                                               |
| Q9JKF1                     | Ras GTPase-activating-like protein IQGAP1                         | 1.375E8 | enzyme regulator activity; protein binding                                                                           |
| P12815                     | Programmed cell death protein 6                                   | 1.362E8 | catalytic activity; metal ion binding; protein binding                                                               |
| Q6ZWZ6, P25444 P62242      | 40S ribosomal protein S12, S8, S2                                 | 1.350E8 | RNA binding                                                                                                          |
| Q91XX1                     | Protein Pcdhga11                                                  | 1.337E8 | metal ion binding                                                                                                    |
| Q3TYX2                     | LRRN4 C-terminal-like protein                                     | 1.328E8 | protein binding                                                                                                      |
| O88668                     | Protein CREG1                                                     | 1.327E8 | protein binding; nucleotide binding; catalytic activity                                                              |
| Q99K51                     | Plastin-3                                                         | 1.311E8 | protein binding; metal ion binding                                                                                   |
| Q32ME1                     | ATPase, Ca <sup>++</sup> transporting, plasma membrane 4          | 1.305E8 | nucleotide, protein, metal ion binding                                                                               |
| P51569                     | Alpha-galactosidase A                                             | 1.300E8 | catalytic activity; protein binding                                                                                  |
| Q6X893                     | Choline transporter-like protein 1                                | 1.285E8 | transporter activity                                                                                                 |
| D3Z6C3                     | Uncharacterized protein                                           | 1.271E8 | structural molecule activity                                                                                         |
| P26231                     | Catenin alpha-1                                                   | 1.266E8 | structural molecule activity; protein binding; RNA binding                                                           |
| H3BKL7                     | Deoxyribonuclease-1                                               | 1.251E8 | catalytic activity                                                                                                   |
| Q99LX0                     | Protein DJ-1                                                      | 1.239E8 | RNA binding; antioxidant activity; catalytic activity; protein binding; metal ion binding; enzyme regulator activity |
| O70589-3                   | Isoform 3 of Peripheral plasma membrane protein CASK              | 1.236E8 | nucleotide binding; catalytic activity; protein binding                                                              |
| D3Z5U5                     | P2X purinoceptor (Fragment)                                       | 1.227E8 | receptor activity; signal transducer activity; transporter activity; nucleotide binding                              |
| Q9WVE8                     | Protein kinase C and casein kinase substrate in neurons protein 2 | 1.225E8 | protein binding; catalytic activity                                                                                  |
| Q9DB05                     | Alpha-soluble NSF attachment protein                              | 1.222E8 | protein binding                                                                                                      |
| P46935                     | E3 ubiquitin-protein ligase NEDD4                                 | 1.222E8 | catalytic activity; protein binding                                                                                  |
| P34022                     | Ran-specific GTPase-activating protein                            | 1.217E8 | enzyme regulator activity                                                                                            |
| Q61553                     | Fascin                                                            | 1.214E8 | protein binding; RNA binding                                                                                         |
| E9QAZ2                     | Ribosomal protein L15                                             | 1.205E8 | structural molecule activity                                                                                         |
| Q9CZD3                     | Glycine--tRNA ligase                                              | 1.201E8 | nucleotide binding; catalytic activity; protein binding                                                              |
| Q8CCK0                     | Core histone macro-H2A.2                                          | 1.194E8 | DNA binding; protein binding                                                                                         |
| O08553                     | Dihydropyrimidinase-related protein 2                             | 1.176E8 | protein binding; catalytic activity                                                                                  |
| Q8C7B4                     | Gamma-glutamyltransferase 5                                       | 1.166E8 | catalytic activity                                                                                                   |
| Q91ZX7                     | Prolow-density lipoprotein receptor-related protein 1             | 1.166E8 | protein binding; metal ion binding; RNA binding                                                                      |
| P70699                     | Lysosomal alpha-glucosidase                                       | 1.158E8 | catalytic activity                                                                                                   |
| P61971                     | Nuclear transport factor 2                                        | 1.157E8 | protein binding; transporter activity                                                                                |
| Q9Z2U1                     | Proteasome subunit alpha type-5                                   | 1.149E8 | catalytic activity                                                                                                   |
| Q60634-3                   | Isoform 3 of Flotillin-2                                          | 1.140E8 | protein binding                                                                                                      |
| Q91XH6                     | Vesicle transport through interaction with t-SNAREs 1B homolog    | 1.133E8 | protein binding                                                                                                      |
| Q60598                     | Src substrate cortactin                                           | 1.123E8 | protein binding                                                                                                      |
| E9PUX4P14115 P27659 Q6ZVV7 | 60S ribosomal protein L6, L3, L35, L27A                           | 1.118E8 | structural molecule activity                                                                                         |
| Q00612                     | Glucose-6-phosphate 1-dehydrogenase X                             | 1.115E8 | nucleotide binding; catalytic activity; protein binding                                                              |

|               |                                                                            |         |                                                                                                        |
|---------------|----------------------------------------------------------------------------|---------|--------------------------------------------------------------------------------------------------------|
| O08997        | Copper transport protein ATOX1                                             | 1.115E8 | transporter activity; metal ion binding; protein binding                                               |
| O70475        | UDP-glucose 6-dehydrogenase                                                | 1.108E8 | nucleotide binding; catalytic activity                                                                 |
| P51881,P48962 | ADP/ATP translocase 1, 2                                                   | 1.085E8 | transporter activity                                                                                   |
| P99027        | 60S acidic ribosomal protein P2                                            | 1.079E8 | structural molecule activity                                                                           |
| O88844        | Isocitrate dehydrogenase [NADP] cytoplasmic                                | 1.077E8 | metal ion binding; catalytic activity; protein binding                                                 |
| E9QNH6        | Unconventional myosin-Ib                                                   | 1.073E8 | nucleotide binding; catalytic activity                                                                 |
| P26618        | Platelet-derived growth factor receptor alpha                              | 1.072E8 | catalytic activity; motor activity; nucleotide binding; protein binding                                |
| Q61768        | Kinesin-1 heavy chain                                                      | 1.072E8 | nucleotide binding; catalytic activity; receptor activity; signal transducer activity; protein binding |
| P45377        | Aldose reductase-related protein 2                                         | 1.068E8 | nucleotide binding; catalytic activity; motor activity; protein binding; transporter activity          |
| P83940        | Transcription elongation factor B polypeptide 1                            | 1.062E8 | catalytic activity; protein binding                                                                    |
| Q9D0R2        | Threonine--tRNA ligase, cytoplasmic                                        | 1.054E8 | nucleotide binding; catalytic activity                                                                 |
| P62137 P63087 | Serine/threonine-protein phosphatase PP1-gamma and alpha catalytic subunit | 1.052E8 | catalytic activity; protein binding; RNA binding; metal ion binding                                    |
| P14152        | Malate dehydrogenase, cytoplasmic                                          | 1.048E8 | nucleotide binding; catalytic activity                                                                 |
| P37889-2      | Isoform 2 of Fibulin-2                                                     | 1.041E8 | metal ion binding; protein binding                                                                     |
| Q60864        | Stress-induced-phosphoprotein 1                                            | 1.031E8 | protein binding; RNA binding                                                                           |
| Q99LD8        | N(G),N(G)-dimethylarginine dimethylaminohydrolase 2                        | 1.025E8 | catalytic activity                                                                                     |
| P12265        | Beta-glucuronidase                                                         | 1.014E8 | catalytic activity; protein binding                                                                    |

**Table S3.** Mass Spectrometry analysis of mCAF derived EVs, mCAFs were isolated from HTR xenografts (Figure 2), cultured in vitro and EVs were isolated. Identified peptides were filtered using 1% False Discovery Rate (FDR) and Percolator (Kall et al, Nat Methods. 2007 Nov;4(11):923-5). Proteins were sorted out according to estimated abundance, which is represented in the column titled "Area". The area is calculated based on the most abundant peptides for the respective protein (Silva et al, Mol Cell Proteomics. 2006 Jan;5(1):144-56). Proteins not detected or present in low amounts are assigned an area zero. Proteins are annotated according to their molecular function, cellular component and biological process. Data were extracted and queried against Uniprot Mouse using Proteome Discoverer and Mascot. Potential common Fetal Bovine Serum and human contaminants were included in the Mouse database and were labeled "CON" in the column "Accession" (Bunkenborg et al, Proteomics. 2010, Aug;10(16):3040-4).

**Table S4.** Primers used in the study**Murine Mitochondrial Primers (Tan et al<sup>2</sup>)**

| Murine Mitochondrial DNA |                            |          |              |               |                          |
|--------------------------|----------------------------|----------|--------------|---------------|--------------------------|
| Gene                     | Sequence 5'-3'             | Position | Length (bps) | Assay         | Reference                |
| DLoop                    | AGGTTTGGCTCCTGGCCTTAT      | 72 F     | 149          | Real Time/PCR | SnapGene Viewer Software |
|                          | GTGGCTAGGCAAGGTGTCTT       | 221 R    |              |               |                          |
| ND1 (1)                  | CTAGAAACCCCGAACCAAA        | 1323 F   | 105          |               |                          |
|                          | CCAGCTATCACCAAGCTCGT       | 1428 R   |              |               |                          |
| ND1 (2)                  | CAGCCGGCCCATTCGCGTTA       | 3398 F   | 197          |               |                          |
|                          | AGCGGAAGCGTGGATAGGATGC     | 3595 R   |              |               |                          |
| ND2                      | TCCTCCTGGCCATCGTACTCAACT   | 4123 F   | 131          |               |                          |
|                          | AGAAGTGGAAATGGGCGAGGC      | 4254 R   |              |               |                          |
| COX1                     | CCAGTGTAGCCCGAGGCAT        | 5927 F   | 127          |               |                          |
|                          | TCTGGGTGCCCAAAGAATCAGAACA  | 6054 R   |              |               |                          |
| COX2                     | AGTTGATAACCGAGTCGTTCTGCCA  | 7425 F   | 123          |               |                          |
|                          | TCGGCCTGGGATGGCATCAGT      | 7548 R   |              |               |                          |
| ATP8                     | ATGCCACAACCTAGATACATCAACA  | 7768F    | 176          |               |                          |
|                          | GGGTAATGAATGAGGCAA         | 7944R    |              |               |                          |
| ATP6                     | GCTCTCACTCGCCCACTTCCTTCC   | 8297 F   | 529          |               |                          |
|                          | GCCGGACTGCTAATGCCATTGGTT   | 8826 R   |              |               |                          |
| COX3                     | ACCTACCAAGGCCACCACACTCC    | 8804 F   | 149          |               |                          |
|                          | GCAGCCTCCTAGATCATGTGTTGGT  | 8953 R   |              |               |                          |
| ND3                      | ACCCTACAAGCTCTGCACGCC      | 9585 F   | 385          |               |                          |
|                          | GCTCATGGTAGTGAAGTAGAAGGGCA | 9970 R   |              |               |                          |
| ND4 L                    | TCGCTCCCACCTAATATCCACATTGC | 9945 F   | 141          |               |                          |
|                          | GCAGGCTGCGAAAACCAAGATGG    | 10086 R  |              |               |                          |
| ND4                      | TCGCCTACTCCTCAGTTAGCCACA   | 11026 F  | 115          |               |                          |
|                          | TGATGATGTGAGGCCATGTGCGA    | 11141 R  |              |               |                          |
| ND5                      | TCGGAAGCCTCGCCCTCACA       | 12868 F  | 105          |               |                          |
|                          | AGTAGGGCTCAGGCGTTGGTGT     | 12973 R  |              |               |                          |
| ND6                      | AATACCCGCAAACAAGATCACCCAG  | 13585 F  | 99           |               |                          |
|                          | TGTTGGGGTTATGTTAGAGGGAGGGA | 13684 R  |              |               |                          |
| Cytb                     | ACAGCAAACGGAGCCTCAA        | 14394 F  | 134          |               |                          |
|                          | TGCTGTGGCTATGACTGCGAACA    | 14528 R  |              |               |                          |

**Human Mitochondrial Primers**

| Human Mitochondrial DNA-RNA |                                  |          |              |               |                          |
|-----------------------------|----------------------------------|----------|--------------|---------------|--------------------------|
| Gene                        | Sequence 5'-3'                   | Position | Length (bps) | Assay         | Reference                |
| DLoop                       | TGGCCACAGCACTTAAACACATCTC        | 321 F    | 175          | Real Time/PCR | SnapGene Viewer Software |
|                             | GGGTTGTATTGATGAGATTAGTAGTATGGGAG | 496 R    |              |               |                          |
| 12S                         | CCGTTCCAGTGAGTTCACCC             | 706 F    | 112          |               |                          |
|                             | TGTGGGGGTGCCCTTTGTC              | 818 R    |              |               |                          |
| 16S                         | AACTTTGCAAGGAGAGCCAAAGC          | 1873 F   | 205          |               |                          |
|                             | GGGATTTAGAGGGTTCTGTGGGC          | 2078 R   |              |               |                          |
| ND1                         | ACGCCATAAACTCTTCACCAAAG          | 3458 F   | 103          | Real Time/PCR |                          |
|                             | TAGTAGAAGAGCGATGGTGAGAGCTA       | 3561 R   |              |               |                          |
| ND2                         | CTTCTGAGTCCCAGAGGTTACCCA         | 4805 F   | 182          | Real Time/PCR |                          |
|                             | CCGTCAACTCCACCTAATTTGGTTTG       | 4987 R   |              |               |                          |
| COX1                        | TGCCATAACCCAATACCAAACGC          | 6425 F   | 112          |               |                          |
|                             | CTGTTAGTAGTATAGTGATGCCAGCAGCTAGG | 6537 R   |              |               |                          |
| COX2                        | CTACGGTCAATGCTCTGAAATCTGTG       | 8161 F   | 153          |               |                          |
|                             | GCTAAGTTAGCTTTACAGTGGGCTCTAG     | 8314 R   |              |               |                          |
| ATP6                        | GAAAATCTGTTTCGTTTCATTTCATTGCC    | 8533 F   | 138          |               |                          |
|                             | GCTGATTAGTGGTGGGTTGTTACTG        | 8671 R   |              |               |                          |
| COX3                        | CGATACGGGATAATCCTATTTATTACCTCAG  | 9444 F   | 199          |               |                          |
|                             | CAGGTGATTGATACTCCTGATGCGA        | 9643 R   |              |               |                          |
| ND3                         | CATTTTGACTACCACAACCTCAACGGCTAC   | 10120 F  | 160          |               |                          |
|                             | GGGTAAGGAGGGCAATTTCTAGATC        | 10280 R  |              |               |                          |

|        |                                               |         |      |               |                              |
|--------|-----------------------------------------------|---------|------|---------------|------------------------------|
| ND4L   | GCTACTCTCATAACCCTCAACACCC                     | 10599 F | 130  |               |                              |
|        | AGGCCATATGTGTTGGAGATTGAGA                     | 10729 R |      |               |                              |
| ND4    | CCAACGCCACTTATCCAGTG                          | 10999 F | 237  |               |                              |
|        | GGGAAGGGAGCCTACTAGGGTGT                       | 11236 R |      |               |                              |
| ND5    | TTACCACCCTCGTTAACCCCTAACAAA                   | 12395 F | 165  | Real Time/PCR |                              |
|        | TGGTTGTTTGGGTTGTGGCT                          | 12560 R |      |               |                              |
| ND6    | ACGCCATAATCATACAAAGCCC                        | 14224 F | 149  | Real Time/PCR |                              |
|        | GGATTGGTGCTGTGGGTGAAA                         | 14373 R |      |               |                              |
| Cyt-b  | CGCCTGCCTGATCCTCCAA                           | 14860 F | 191  |               |                              |
|        | AGGCCTCGCCCGATGTGTAG                          | 15051 R |      |               |                              |
| Mito 1 | [aminoC6]ACATAGCACATTACAGTCAAATCCCTTCTCGTCCCC | 16331 F | 3968 |               |                              |
|        | [aminoC6]TGAGATTGTTTGGGCTACTGCTCGCAGTGC       | 3729 R  |      |               |                              |
| Mito 2 | [aminoC6]TACTCAATCCTCTGATCAGGGTGAGCATCAAATC   | 3646 F  | 5513 | Long PCR      | Dames S., et al <sup>1</sup> |
|        | [aminoC6]GCTTGGATTAAGGCGACAGCGATTCTAGGATAGT   | 9458 R  |      |               |                              |
| Mito 3 | [aminoC6]TCATTTTTATTGCCACAATAACCTCCTCGGACTC   | 8753 F  | 9289 |               |                              |
|        | [aminoC6]CGTGATGTCTTATTTAAGGGGAACGTGTGGGCTAT  | 16566 R |      |               |                              |

### Housekeeping Primers Human (nDNA)

| Housekeeping Genes |                            |          |              |               |        |                                   |
|--------------------|----------------------------|----------|--------------|---------------|--------|-----------------------------------|
| Gene               | Sequence                   | Position | Length (bps) | Assay         | Target | Reference                         |
| ACTB               | AGGATCTTCATGAGGTAGTCAGTCAG | 1358 F   | 98           | Real Time     | DNA    | Clone Manager 9 (Sci-Ed Software) |
|                    | CCACACTGTGCCATCTACG        | 1456 R   |              |               |        |                                   |
| GAPDH              | CTCTGCTCCTCTGTTTCGAC       | 5030 F   | 126          | Real Time/PCR | DNA    | SnapGene Viewer Software          |
|                    | CGCCCGCGTCCGGCCTACACA      | 5156 R   |              |               |        |                                   |
| ACTB               | ACCAACTGGGACGACATGGAG      | 313 F    | 379          | PCR           | RNA    | Clone Manager 9 (Sci-Ed Software) |
|                    | GTGGTGGTGAAGCTGTAGCC       | 692 R    |              |               |        |                                   |

### Housekeeping Primers Murine (nDNA)

| Housekeeping Genes |                          |            |              |               |         |                          |
|--------------------|--------------------------|------------|--------------|---------------|---------|--------------------------|
| Gene               | Sequence                 | Position   | Length (bps) | Assay         | Target  | Reference                |
| GAPDH              | AGCAGCCGCATCTTCTGTGCAGTG | 38,619,737 | 226          | Real Time/PCR | DNA/RNA | SnapGene Viewer Software |
|                    | GGCCTTGACTGTGCCGTTGAATTT | 38,619,962 |              |               |         |                          |
| COX4               | ATTGGCAAGAGAGCCATTTCTAC  | 160        | 100          | Real Time/PCR | DNA/RNA | Tan et al <sup>2</sup>   |
|                    | CACGCCGATCAGCGTAAGT      | 259        |              |               |         |                          |

### References

1. Dames, S., Eilbeck, K. & Mao, R. A high-throughput next-generation sequencing assay for the mitochondrial genome. *Methods in molecular biology* **1264**, 77-88 (2015).
2. Tan, A.S. *et al.* Mitochondrial genome acquisition restores respiratory function and tumorigenic potential of cancer cells without mitochondrial DNA. *Cell metabolism* **21**, 81-94 (2015).
